# Supplementary material for: Quest: structure and properties of BTF–nitrobenzene cocrystals with different ratios of components
Source: Royal Society of Chemistry journal article supplement (doi:10.1039/d1ce00977j), 2021-11-15
Supplement: d1ce00977j1.pdf [file d1ce00977j1.pdf]

## Quest: structure and properties of BTF-nitrobenzenes cocrystals with different ratio of components

Nikita M. Baraboshkin<sup>a\*</sup>, Victor P. Zelenov<sup>a</sup>, Michael E. Minyaev<sup>a</sup>,  
and Tatyana S. Pivina<sup>a</sup>

<sup>a</sup>*N. D. Zelinsky Institute of Organic Chemistry, Russian Academy of Sciences,  
47 Leninsky prosp., Moscow 119991, Russian Federation*

In the supporting materials, models of the predicted cocrystal structures in .cif format and the coordinates of the atoms of the BTF-benzene solvate are presented.

### Simulated and experimental structure of BTF-benzene solvate

#### Experimental

data\_BTF-benzene(1:1)

```
_audit_creation_method      'SHELXL-2018/3'  
_shelx_SHELXL_version_number  '2018/3'  
_chemical_name_systematic    ?  
_chemical_name_common        ?  
_chemical_melting_point      ?  
_chemical_formula_moiety     ?  
_chemical_formula_sum        'C16 H18 N7 O'  
_chemical_formula_weight     324.37  
  
loop_  
  _atom_type_symbol  
  _atom_type_description  
  _atom_type_scatter_dispersion_real  
  _atom_type_scatter_dispersion_imag  
  _atom_type_scatter_source  
  'C' 'C' 0.0033 0.0016  
  'International Tables Vol C Tables 4.2.6.8 and 6.1.1.4'  
  'H' 'H' 0.0000 0.0000  
  'International Tables Vol C Tables 4.2.6.8 and 6.1.1.4'  
  'N' 'N' 0.0061 0.0033  
  'International Tables Vol C Tables 4.2.6.8 and 6.1.1.4'  
  'O' 'O' 0.0106 0.0060  
  'International Tables Vol C Tables 4.2.6.8 and 6.1.1.4'  
  
_space_group_crystal_system  monoclinic  
_space_group_IT_number       14  
_space_group_name_H-M_alt    'P 21/c'
```

\_space\_group\_name\_Hall        '-P 2ybc'

\_shelx\_space\_group\_comment

;

The symmetry employed for this shelxl refinement is uniquely defined by the following loop, which should always be used as a source of symmetry information in preference to the above space-group names. They are only intended as comments.

;

loop\_

\_space\_group\_symop\_operation\_xyz

'x, y, z'

'-x, y+1/2, -z+1/2'

'-x, -y, -z'

'x, -y-1/2, z-1/2'

\_cell\_length\_a            13.6970(10)  
\_cell\_length\_b            7.1953(5)  
\_cell\_length\_c            15.0055(11)  
\_cell\_angle\_alpha         90  
\_cell\_angle\_beta          116.552(2)  
\_cell\_angle\_gamma         90  
\_cell\_volume              1322.88(17)  
\_cell\_formula\_units\_Z     4  
\_cell\_measurement\_temperature 100(2)  
\_cell\_measurement\_reflns\_used ?  
\_cell\_measurement\_theta\_min ?  
\_cell\_measurement\_theta\_max ?  
  
\_exptl\_crystal\_description ?  
\_exptl\_crystal\_colour     ?  
\_exptl\_crystal\_density\_meas ?  
\_exptl\_crystal\_density\_method ?  
\_exptl\_crystal\_density\_diffn 1.629  
\_exptl\_crystal\_F\_000      684  
\_exptl\_transmission\_factor\_min ?  
\_exptl\_transmission\_factor\_max ?  
\_exptl\_crystal\_size\_max    0.590  
\_exptl\_crystal\_size\_mid    0.210  
\_exptl\_crystal\_size\_min    0.020  
\_exptl\_absorpt\_coefficient\_mu 0.110  
\_shelx\_estimated\_absorpt\_T\_min 0.938  
\_shelx\_estimated\_absorpt\_T\_max 0.998  
\_exptl\_absorpt\_correction\_type ?  
\_exptl\_absorpt\_correction\_T\_min ?  
\_exptl\_absorpt\_correction\_T\_max ?

\_exptl\_absorpt\_process\_details ?  
\_exptl\_absorpt\_special\_details ?  
\_diffn\_ambient\_temperature 100(2)  
\_diffn\_radiation\_wavelength 0.71073  
\_diffn\_radiation\_type MoK $\alpha$   
\_diffn\_source ?  
\_diffn\_measurement\_device\_type ?  
\_diffn\_measurement\_method ?  
\_diffn\_detector\_area\_resol\_mean ?  
\_diffn\_reflns\_number 11131  
\_diffn\_reflns\_av\_unetl/netl 0.0486  
\_diffn\_reflns\_av\_R\_equivalents 0.0440  
\_diffn\_reflns\_limit\_h\_min -17  
\_diffn\_reflns\_limit\_h\_max 17  
\_diffn\_reflns\_limit\_k\_min -9  
\_diffn\_reflns\_limit\_k\_max 9  
\_diffn\_reflns\_limit\_l\_min -19  
\_diffn\_reflns\_limit\_l\_max 16  
\_diffn\_reflns\_theta\_min 2.732  
\_diffn\_reflns\_theta\_max 27.484  
\_diffn\_reflns\_theta\_full 25.242  
\_diffn\_measured\_fraction\_theta\_max 0.998  
\_diffn\_measured\_fraction\_theta\_full 0.998  
\_diffn\_reflns\_Laue\_measured\_fraction\_max 0.998  
\_diffn\_reflns\_Laue\_measured\_fraction\_full 0.998  
\_diffn\_reflns\_point\_group\_measured\_fraction\_max 0.998  
\_diffn\_reflns\_point\_group\_measured\_fraction\_full 0.998  
\_reflns\_number\_total 3030  
\_reflns\_number\_gt 1772  
\_reflns\_threshold\_expression ' $I > 2\sigma(I)$ '  
\_reflns\_Friedel\_coverage 0.000  
\_reflns\_Friedel\_fraction\_max .  
\_reflns\_Friedel\_fraction\_full .

\_reflns\_special\_details

;

Reflections were merged by SHELXL according to the crystal class for the calculation of statistics and refinement.

\_reflns\_Friedel\_fraction is defined as the number of unique Friedel pairs measured divided by the number that would be possible theoretically, ignoring centric projections and systematic absences.

;

\_computing\_data\_collection ?  
\_computing\_cell\_refinement ?

\_computing\_data\_reduction ?  
 \_computing\_structure\_solution 'SHELXT 2014/5 (Sheldrick, 2014)'  
 \_computing\_structure\_refinement 'SHELXL-2018/3 (Sheldrick, 2018)'  
 \_computing\_molecular\_graphics ?  
 \_computing\_publication\_material ?  
 \_refine\_special\_details ?  
 \_refine\_ls\_structure\_factor\_coef Fsqd  
 \_refine\_ls\_matrix\_type full  
 \_refine\_ls\_weighting\_scheme calc  
 \_refine\_ls\_weighting\_details  
 'w=1/[\s^2^(Fo^2^)+(0.2000P)^2^] where P=(Fo^2^+2Fc^2^)/3'  
 \_atom\_sites\_solution\_primary ?  
 \_atom\_sites\_solution\_secondary ?  
 \_atom\_sites\_solution\_hydrogens geom  
 \_refine\_ls\_hydrogen\_treatment constr  
 \_refine\_ls\_extinction\_method none  
 \_refine\_ls\_extinction\_coef .  
 \_refine\_ls\_number\_reflns 3030  
 \_refine\_ls\_number\_parameters 150  
 \_refine\_ls\_number\_restraints 136  
 \_refine\_ls\_R\_factor\_all 0.2932  
 \_refine\_ls\_R\_factor\_gt 0.2359  
 \_refine\_ls\_wR\_factor\_ref 0.6242  
 \_refine\_ls\_wR\_factor\_gt 0.5774  
 \_refine\_ls\_goodness\_of\_fit\_ref 2.377  
 \_refine\_ls\_restrained\_S\_all 2.323  
 \_refine\_ls\_shift/su\_max 0.111  
 \_refine\_ls\_shift/su\_mean 0.015

loop\_

\_atom\_site\_label  
 \_atom\_site\_type\_symbol  
 \_atom\_site\_fract\_x  
 \_atom\_site\_fract\_y  
 \_atom\_site\_fract\_z  
 \_atom\_site\_U\_iso\_or\_equiv  
 \_atom\_site\_adp\_type  
 \_atom\_site\_occupancy  
 \_atom\_site\_site\_symmetry\_order  
 \_atom\_site\_calc\_flag  
 \_atom\_site\_refinement\_flags\_posn  
 \_atom\_site\_refinement\_flags\_adp  
 \_atom\_site\_refinement\_flags\_occupancy  
 \_atom\_site\_disorder\_assembly  
 \_atom\_site\_disorder\_group  
 C1F C 0.1351(6) -0.0573(9) 0.4143(6) 0.0442(18) Uani 1 1 d . . . . .  
 H1F H 0.061394 -0.098129 0.381293 0.053 Uiso 1 1 calc R U . . .

C2F C 0.1892(7) 0.0038(9) 0.3604(6) 0.048(2) Uani 1 1 d . . . . .  
H2F H 0.152876 0.006106 0.289683 0.058 Uiso 1 1 calc R U . . . .  
C3F C 0.2978(6) 0.0619(9) 0.4115(6) 0.0449(18) Uani 1 1 d . . . . .  
H3F H 0.335147 0.103845 0.375028 0.054 Uiso 1 1 calc R U . . . .  
C4F C 0.3505(6) 0.0590(8) 0.5128(6) 0.0425(18) Uani 1 1 d . . . . .  
H4F H 0.424438 0.098145 0.546117 0.051 Uiso 1 1 calc R U . . . .  
C5F C 0.2981(6) 0.0001(8) 0.5678(6) 0.0407(17) Uani 1 1 d . . . . .  
H5F H 0.334893 -0.000742 0.638543 0.049 Uiso 1 1 calc R U . . . .  
C6F C 0.1915(6) -0.0573(9) 0.5178(6) 0.0420(17) Uani 1 1 d . . . . .  
H6F H 0.155004 -0.098362 0.555206 0.050 Uiso 1 1 calc R U . . . .  
C1A C 0.1765(5) 0.4759(11) 0.3984(4) 0.0342(12) Uani 0.5 1 d DG . P A 1  
C2A C 0.2736(7) 0.5538(11) 0.4081(5) 0.0342(12) Uani 0.5 1 d DG . P A 1  
C3A C 0.3593(5) 0.5823(11) 0.5022(6) 0.0342(12) Uani 0.5 1 d DG . P A 1  
C4A C 0.3479(5) 0.5328(12) 0.5866(4) 0.0342(12) Uani 0.5 1 d DG . P A 1  
C5A C 0.2508(7) 0.4549(12) 0.5769(4) 0.0342(12) Uani 0.5 1 d DG . P A 1  
C6A C 0.1651(5) 0.4264(12) 0.4828(6) 0.0342(12) Uani 0.5 1 d DG . P A 1  
N1A N 0.1074(9) 0.4697(17) 0.2982(5) 0.0757(17) Uani 0.5 1 d D . P A 1  
N2A N 0.2837(8) 0.6046(18) 0.3244(6) 0.0757(17) Uani 0.5 1 d D . P A 1  
N3A N 0.4629(6) 0.6541(18) 0.5384(8) 0.0757(17) Uani 0.5 1 d D . P A 1  
N4A N 0.4327(7) 0.5768(18) 0.6773(6) 0.0757(17) Uani 0.5 1 d D . P A 1  
N5A N 0.2118(8) 0.3910(17) 0.6412(7) 0.0757(17) Uani 0.5 1 d D . P A 1  
N6A N 0.0743(7) 0.353(2) 0.4864(8) 0.0757(17) Uani 0.5 1 d D . P A 1  
O1A O 0.1686(8) 0.5519(15) 0.2411(8) 0.0760(18) Uani 0.5 1 d D . P A 1  
O2A O 0.5222(9) 0.6679(17) 0.6543(7) 0.0760(18) Uani 0.5 1 d D . P A 1  
O3A O 0.0936(8) 0.3113(16) 0.5949(7) 0.0760(18) Uani 0.5 1 d D . P A 1  
O4A O 0.3726(13) 0.676(3) 0.3435(14) 0.0760(18) Uani 0.25 1 d D . P A 1  
O5A O 0.441(2) 0.570(3) 0.7624(12) 0.0760(18) Uani 0.25 1 d D . P A 1  
C1B C 0.2149(6) 0.5180(12) 0.3838(4) 0.0342(12) Uani 0.5 1 d DG . P B 2  
C2B C 0.3208(6) 0.5723(11) 0.4477(6) 0.0342(12) Uani 0.5 1 d DG . P B 2  
C3B C 0.3595(4) 0.5542(12) 0.5501(5) 0.0342(12) Uani 0.5 1 d DG . P B 2  
C4B C 0.2923(6) 0.4817(12) 0.5887(4) 0.0342(12) Uani 0.5 1 d DG . P B 2  
C5B C 0.1864(6) 0.4274(12) 0.5249(6) 0.0342(12) Uani 0.5 1 d DG . P B 2  
C6B C 0.1477(4) 0.4455(12) 0.4225(5) 0.0342(12) Uani 0.5 1 d DG . P B 2  
N1B N 0.2138(10) 0.5592(19) 0.2940(6) 0.0757(17) Uani 0.5 1 d D . P B 2  
N2B N 0.3849(8) 0.6458(18) 0.4075(7) 0.0757(17) Uani 0.5 1 d D . P B 2  
N3B N 0.4544(7) 0.5993(18) 0.6325(6) 0.0757(17) Uani 0.5 1 d D . P B 2  
N4B N 0.3285(9) 0.4632(18) 0.6896(5) 0.0757(17) Uani 0.5 1 d D . P B 2  
N5B N 0.1005(7) 0.3489(19) 0.5350(9) 0.0757(17) Uani 0.5 1 d D . P B 2  
N6B N 0.0435(6) 0.3944(17) 0.3567(7) 0.0757(17) Uani 0.5 1 d D . P B 2  
O1B O 0.3164(8) 0.6487(17) 0.2920(7) 0.0760(18) Uani 0.5 1 d D . P B 2  
O2B O 0.4468(9) 0.5407(15) 0.7292(8) 0.0760(18) Uani 0.5 1 d D . P B 2  
O3B O 0.0023(9) 0.3165(16) 0.4308(7) 0.0760(18) Uani 0.5 1 d D . P B 2  
O4B O 0.5236(10) 0.6682(17) 0.6114(10) 0.0760(18) Uani 0.5 1 d D . P B 2

## Simulated

data\_ BTF-benzene(1:1)\_-4.112587E+01

\_chemical\_name\_systematic

;RAS BTFO\_C3H

E(total)=-1.88437E+01 E(coul)=-1.00109E+01 E(vdW)=-8.83278E+00 Density= 1.60557

;

\_cell\_length\_a 13.811

\_cell\_length\_b 7.363

\_cell\_length\_c 14.799

\_cell\_angle\_alpha 90.00

\_cell\_angle\_beta 114.79

\_cell\_angle\_gamma 90.00

\_cell\_formula\_units\_Z 4

\_symmetry\_space\_group\_name\_H-M 'P 21/C '

\_symmetry\_Int\_Tables\_number 14

loop\_

\_symmetry\_equiv\_pos\_as\_xyz

1 x,y,z

2 -x,1/2+y,1/2-z

3 -x,-y,-z

4 x,1/2-y,1/2+z

loop\_

\_atom\_site\_label

\_atom\_site\_fract\_x

\_atom\_site\_fract\_y

\_atom\_site\_fract\_z

|      |         |          |          |      |
|------|---------|----------|----------|------|
| C1A  | 0.25581 | -0.05836 | -0.07312 | # 1  |
| C2A  | 0.15338 | 0.01086  | -0.09896 | # 2  |
| C3A  | 0.12586 | 0.08305  | -0.02556 | # 3  |
| C4A  | 0.20075 | 0.08604  | 0.07368  | # 4  |
| C5A  | 0.30318 | 0.01682  | 0.09952  | # 5  |
| C6A  | 0.33070 | -0.05537 | 0.02612  | # 6  |
| H7A  | 0.27722 | -0.11450 | -0.13020 | # 7  |
| H8A  | 0.09514 | 0.00854  | -0.17613 | # 8  |
| H9A  | 0.04620 | 0.13688  | -0.04565 | # 9  |
| H10A | 0.17934 | 0.14218  | 0.13076  | # 10 |
| H11A | 0.36142 | 0.01914  | 0.17669  | # 11 |
| H12A | 0.41036 | -0.10920 | 0.04621  | # 12 |
| C1   | 0.23252 | -0.06820 | 0.61117  | # 49 |
| C2   | 0.16610 | -0.05880 | 0.50658  | # 50 |
| C3   | 0.20577 | 0.00481  | 0.43635  | # 51 |
| C4   | 0.31521 | 0.05957  | 0.47399  | # 52 |
| C5   | 0.38512 | 0.05254  | 0.57857  | # 53 |
| C6   | 0.34211 | -0.01163 | 0.64552  | # 54 |
| N7   | 0.06956 | -0.11699 | 0.49231  | # 55 |
| O8   | 0.07897 | -0.16339 | 0.59353  | # 56 |
| N'9  | 0.18053 | -0.12972 | 0.66133  | # 57 |
| N'10 | 0.15684 | 0.02212  | 0.33939  | # 58 |

|      |          |          |         |      |
|------|----------|----------|---------|------|
| O11  | 0.23026  | 0.08803  | 0.30874 | # 59 |
| N12  | 0.33385  | 0.11251  | 0.39681 | # 60 |
| N'13 | 0.48604  | 0.09673  | 0.62537 | # 61 |
| O14  | 0.51418  | 0.06450  | 0.72382 | # 62 |
| N15  | 0.42000  | -0.00638 | 0.73697 | # 63 |
| O16  | 0.40966  | 0.17039  | 0.38465 | # 64 |
| O17  | -0.01542 | -0.13781 | 0.42148 | # 65 |
| O18  | 0.42917  | -0.04344 | 0.81996 | # 66 |
| #END |          |          |         |      |

### Simulated cocrystal structures of BTF-Nitrobenzene

data\_BTF-nitrobenzene(1:1)\_\_\_\_\_ -4.22904E+01

\_chemical\_name\_systematic

;RAS

E(total)=-4.22904E+01 E(coul)=-1.13322E+01 E(vdW)=-3.13261E+01 Density= 1.71976

;

\_cell\_length\_a 6.391

\_cell\_length\_b 18.706

\_cell\_length\_c 12.595

\_cell\_angle\_alpha 90.00

\_cell\_angle\_beta 74.25

\_cell\_angle\_gamma 90.00

\_cell\_formula\_units\_Z 4

\_symmetry\_space\_group\_name\_H-M 'P 21/C '

\_symmetry\_Int\_Tables\_number 14

loop\_

\_symmetry\_equiv\_pos\_as\_xyz

1 x,y,z

2 -x,1/2+y,1/2-z

3 -x,-y,-z

4 x,1/2-y,1/2+z

loop\_

\_atom\_site\_label

\_atom\_site\_fract\_x

\_atom\_site\_fract\_y

\_atom\_site\_fract\_z

|     |          |          |         |     |
|-----|----------|----------|---------|-----|
| C1a | -0.15429 | -0.19911 | 0.40958 | # 1 |
|-----|----------|----------|---------|-----|

|     |         |          |         |     |
|-----|---------|----------|---------|-----|
| C2a | 0.03448 | -0.20968 | 0.31914 | # 2 |
|-----|---------|----------|---------|-----|

|     |         |          |         |     |
|-----|---------|----------|---------|-----|
| C3a | 0.23290 | -0.17050 | 0.30887 | # 3 |
|-----|---------|----------|---------|-----|

|     |         |          |         |     |
|-----|---------|----------|---------|-----|
| C4a | 0.23727 | -0.11960 | 0.39300 | # 4 |
|-----|---------|----------|---------|-----|

|     |         |          |         |     |
|-----|---------|----------|---------|-----|
| C5a | 0.05184 | -0.10692 | 0.48572 | # 5 |
|-----|---------|----------|---------|-----|

|      |          |          |          |      |
|------|----------|----------|----------|------|
| C6a  | -0.14129 | -0.14725 | 0.49202  | # 6  |
| N7a  | -0.01330 | -0.25933 | 0.25381  | # 7  |
| O8a  | -0.24360 | -0.27937 | 0.30862  | # 8  |
| N9a  | -0.31614 | -0.24019 | 0.40259  | # 9  |
| N10a | 0.41861  | -0.17344 | 0.23246  | # 10 |
| O11a | 0.55300  | -0.12538 | 0.26180  | # 11 |
| N12a | 0.43390  | -0.09002 | 0.36724  | # 12 |
| N13a | 0.02799  | -0.06290 | 0.56912  | # 13 |
| O14a | -0.17894 | -0.07178 | 0.63376  | # 14 |
| N15a | -0.29014 | -0.12719 | 0.58312  | # 15 |
| O16a | 0.52572  | -0.04529 | 0.40733  | # 16 |
| O17a | 0.08118  | -0.28834 | 0.16854  | # 17 |
| O18a | -0.47645 | -0.14290 | 0.62830  | # 18 |
| C1   | -0.29420 | 0.11282  | 0.11002  | # 37 |
| C2   | -0.16733 | 0.15356  | 0.02318  | # 38 |
| C3   | 0.05553  | 0.14048  | -0.01687 | # 39 |
| C11  | 0.15294  | 0.08665  | 0.02954  | # 40 |
| C12  | 0.02323  | 0.04671  | 0.11605  | # 41 |
| C6   | -0.19928 | 0.05879  | 0.15734  | # 42 |
| H7   | -0.46722 | 0.12308  | 0.14099  | # 43 |
| H8   | 0.15370  | 0.17219  | -0.08431 | # 44 |
| H12  | -0.29288 | 0.02627  | 0.22468  | # 45 |
| H13  | 0.32506  | 0.07515  | 0.00046  | # 46 |
| H14  | -0.24228 | 0.19559  | -0.01334 | # 47 |
| N9   | 0.12499  | -0.01055 | 0.16586  | # 60 |
| O10  | 0.00380  | -0.05184 | 0.23037  | # 61 |
| O11  | 0.32483  | -0.01358 | 0.14001  | # 62 |

#END

data\_BTF-nitrobenzene(1:2)\_-5.90126E+01

\_chemical\_name\_systematic

;RAS b3lyp-d3

E(total)=-5.90126E+01 E(coul)=-1.27862E+01 E(vdW)=-4.62264E+01 Density= 1.60293

;

\_cell\_length\_a 19.294

\_cell\_length\_b 8.478

\_cell\_length\_c 13.083

\_cell\_angle\_alpha 90.00

\_cell\_angle\_beta 74.79

\_cell\_angle\_gamma 90.00

\_cell\_formula\_units\_Z 4

\_symmetry\_space\_group\_name\_H-M 'P 21/C '

\_symmetry\_Int\_Tables\_number 14

loop\_

\_symmetry\_equiv\_pos\_as\_xyz

1 x,y,z



$2 -x, 1/2+y, 1/2-z$   
 $3 -x, -y, -z$   
 $4 x, 1/2-y, 1/2+z$   
loop\_  
\_atom\_site\_label  
\_atom\_site\_fract\_x  
\_atom\_site\_fract\_y  
\_atom\_site\_fract\_z

|      |          |          |          |      |
|------|----------|----------|----------|------|
| C1a  | 0.33067  | 0.12162  | 0.24364  | # 1  |
| C2a  | 0.32757  | 0.01668  | 0.15934  | # 2  |
| C3a  | 0.26771  | -0.08764 | 0.16563  | # 3  |
| C4a  | 0.21008  | -0.08398 | 0.26019  | # 4  |
| C5a  | 0.21052  | 0.01938  | 0.34734  | # 5  |
| C6a  | 0.27126  | 0.12066  | 0.33708  | # 6  |
| N7a  | 0.38726  | 0.03702  | 0.08193  | # 7  |
| O8a  | 0.42811  | 0.16113  | 0.12264  | # 8  |
| N9a  | 0.38976  | 0.20564  | 0.22131  | # 9  |
| N10a | 0.25628  | -0.18999 | 0.09676  | # 10 |
| O11a | 0.19151  | -0.25809 | 0.14164  | # 11 |
| N12a | 0.16115  | -0.18846 | 0.24898  | # 12 |
| N13a | 0.16286  | 0.03772  | 0.43854  | # 13 |
| O14a | 0.18929  | 0.15032  | 0.49233  | # 14 |
| N15a | 0.26049  | 0.20480  | 0.42569  | # 15 |
| O16a | 0.10351  | -0.23358 | 0.30208  | # 16 |
| O17a | 0.41242  | -0.01833 | -0.00503 | # 17 |
| O18a | 0.29298  | 0.30527  | 0.45955  | # 18 |
| C1   | 0.00093  | 0.30419  | -0.07160 | # 37 |
| C2   | 0.02548  | 0.31474  | -0.18181 | # 38 |
| C3   | 0.08290  | 0.22153  | -0.23700 | # 39 |
| C11  | 0.11611  | 0.11729  | -0.18246 | # 40 |
| C12  | 0.09072  | 0.10876  | -0.07257 | # 41 |
| C6   | 0.03356  | 0.20054  | -0.01588 | # 42 |
| H7   | -0.04366 | 0.37669  | -0.02892 | # 43 |
| H8   | 0.10187  | 0.22994  | -0.32259 | # 44 |
| H12  | 0.01586  | 0.18950  | 0.06947  | # 45 |
| H13  | 0.16069  | 0.04345  | -0.22278 | # 46 |
| H14  | -0.00017 | 0.39576  | -0.22478 | # 47 |
| N9   | 0.12556  | -0.00127 | -0.01421 | # 59 |
| O10  | 0.10225  | -0.00682 | 0.08277  | # 60 |
| O11  | 0.17592  | -0.08112 | -0.06590 | # 61 |
| C1   | 0.52284  | 0.26294  | 0.32473  | # 65 |
| C2   | 0.55910  | 0.29111  | 0.21896  | # 66 |
| C3   | 0.62564  | 0.22045  | 0.17455  | # 67 |
| C11  | 0.65634  | 0.12129  | 0.23548  | # 68 |
| C12  | 0.61921  | 0.09493  | 0.34077  | # 69 |
| C6   | 0.55281  | 0.16409  | 0.38673  | # 70 |
| H7   | 0.47118  | 0.31795  | 0.35903  | # 71 |

|     |         |          |         |      |
|-----|---------|----------|---------|------|
| H8  | 0.65369 | 0.24250  | 0.09240 | # 72 |
| H12 | 0.52614 | 0.13982  | 0.46888 | # 73 |
| H13 | 0.70777 | 0.06473  | 0.20353 | # 74 |
| H14 | 0.53546 | 0.36827  | 0.17105 | # 75 |
| N9  | 0.65132 | -0.00987 | 0.40583 | # 87 |
| O10 | 0.61758 | -0.03143 | 0.49857 | # 88 |
| O11 | 0.70997 | -0.06963 | 0.36359 | # 89 |

#END

data\_BTF-nitrobenzene(1:3)\_-7.57108E+01  
\_chemical\_name\_systematic  
;RAS b3lyp-d3

E(total)=-7.57108E+01 E(coul)=-1.70983E+01 E(vdW)=-5.86124E+01 Density= 1.53113

;  
\_cell\_length\_a 10.546  
\_cell\_length\_b 11.215  
\_cell\_length\_c 13.065  
\_cell\_angle\_alpha 109.28  
\_cell\_angle\_beta 95.02  
\_cell\_angle\_gamma 108.77  
\_cell\_formula\_units\_Z 2  
\_symmetry\_space\_group\_name\_H-M 'P -1 '  
\_symmetry\_Int\_Tables\_number 2  
loop\_  
\_symmetry\_equiv\_pos\_as\_xyz  
1 x,y,z  
2 -x,-y,-z  
loop\_  
\_atom\_site\_label  
\_atom\_site\_fract\_x  
\_atom\_site\_fract\_y  
\_atom\_site\_fract\_z

|      |          |          |          |      |
|------|----------|----------|----------|------|
| C1a  | -0.53070 | -0.58578 | -0.37497 | # 1  |
| C2a  | -0.65602 | -0.64774 | -0.34584 | # 2  |
| C3a  | -0.67824 | -0.59847 | -0.23494 | # 3  |
| C4a  | -0.56978 | -0.48356 | -0.15264 | # 4  |
| C5a  | -0.44166 | -0.41745 | -0.17758 | # 5  |
| C6a  | -0.42481 | -0.47040 | -0.28902 | # 6  |
| N7a  | -0.73825 | -0.75111 | -0.43674 | # 7  |
| O8a  | -0.65707 | -0.75042 | -0.52484 | # 8  |
| N9a  | -0.53243 | -0.64671 | -0.47998 | # 9  |
| N10a | -0.78530 | -0.64249 | -0.19439 | # 10 |
| O11a | -0.75347 | -0.56014 | -0.08493 | # 11 |

|      |          |          |          |      |
|------|----------|----------|----------|------|
| N12a | -0.61191 | -0.45575 | -0.05750 | # 12 |
| N13a | -0.33287 | -0.31250 | -0.11313 | # 13 |
| O14a | -0.24006 | -0.29113 | -0.17773 | # 14 |
| N15a | -0.30044 | -0.39484 | -0.29326 | # 15 |
| O16a | -0.56428 | -0.37244 | 0.03627  | # 16 |
| O17a | -0.85263 | -0.83610 | -0.46002 | # 17 |
| O18a | -0.23369 | -0.39316 | -0.36375 | # 18 |
| C1   | -0.95245 | -1.11455 | -0.27585 | # 37 |
| C2   | -0.86504 | -0.97916 | -0.24619 | # 38 |
| C3   | -0.73462 | -0.92948 | -0.17848 | # 39 |
| C11  | -0.69074 | -1.01467 | -0.13999 | # 40 |
| C12  | -0.77964 | -1.14928 | -0.17063 | # 41 |
| C6   | -0.91012 | -1.20106 | -0.23806 | # 42 |
| H7   | -1.05368 | -1.15289 | -0.32844 | # 43 |
| H8   | -0.66693 | -0.82431 | -0.15556 | # 44 |
| H12  | -0.97528 | -1.30641 | -0.25948 | # 45 |
| H13  | -0.59039 | -0.97941 | -0.08743 | # 46 |
| H14  | -0.89863 | -0.91225 | -0.27591 | # 47 |
| N9   | -0.73401 | -1.24016 | -0.13026 | # 59 |
| O10  | -0.81421 | -1.35860 | -0.15836 | # 60 |
| O11  | -0.61841 | -1.19225 | -0.07084 | # 61 |
| C1   | -0.95288 | -1.20825 | -0.93788 | # 65 |
| C2   | -0.86526 | -1.07588 | -0.91890 | # 66 |
| C3   | -0.73029 | -1.02457 | -0.85874 | # 67 |
| C11  | -0.68206 | -1.10514 | -0.81720 | # 68 |
| C12  | -0.77127 | -1.23682 | -0.83716 | # 69 |
| C6   | -0.90625 | -1.29013 | -0.89692 | # 70 |
| H7   | -1.05765 | -1.24786 | -0.98462 | # 71 |
| H8   | -0.66244 | -0.92175 | -0.84410 | # 72 |
| H12  | -0.97144 | -1.39307 | -0.91014 | # 73 |
| H13  | -0.57814 | -1.06852 | -0.77030 | # 74 |
| H14  | -0.90222 | -1.01257 | -0.95105 | # 75 |
| N9   | -0.72106 | -1.32280 | -0.79349 | # 87 |
| O10  | -0.80162 | -1.43871 | -0.81212 | # 88 |
| O11  | -0.60154 | -1.27361 | -0.74098 | # 89 |
| C1   | -0.90187 | -1.26833 | -0.59457 | # 93 |
| C2   | -0.81348 | -1.13559 | -0.57363 | # 94 |
| C3   | -0.69045 | -1.07549 | -0.49425 | # 95 |
| C11  | -0.65498 | -1.14758 | -0.43535 | # 96 |
| C12  | -0.74470 | -1.27980 | -0.45762 | # 97 |
| C6   | -0.86792 | -1.34180 | -0.53638 | # 98 |
| H7   | -0.99735 | -1.31478 | -0.65625 | # 99 |
| H8   | -0.62198 | -0.97240 | -0.47814 | #100 |
| H12  | -0.93406 | -1.44477 | -0.55059 | #101 |
| H13  | -0.56050 | -1.10404 | -0.37334 | #102 |
| H14  | -0.84053 | -1.07887 | -0.61925 | #103 |
| N9   | -0.70797 | -1.35684 | -0.39566 | #115 |

O10 -0.78873 -1.47340 -0.41670 #116  
O11 -0.59869 -1.30007 -0.32653 #117  
#END

data\_ BTF-nitrobenzene(2:1)\_-6.88951E+01

\_chemical\_name\_systematic

;RAS b3lyp-d3

E(total)=-6.88951E+01 E(coul)=-1.40536E+01 E(vdW)=-5.48415E+01 Density= 1.76762

;

\_cell\_length\_a 6.488

\_cell\_length\_b 11.024

\_cell\_length\_c 16.924

\_cell\_angle\_alpha 100.74

\_cell\_angle\_beta 95.08

\_cell\_angle\_gamma 94.68

\_cell\_formula\_units\_Z 2

\_symmetry\_space\_group\_name\_H-M 'P -1'

\_symmetry\_Int\_Tables\_number 2

loop\_

\_symmetry\_equiv\_pos\_as\_xyz

1 x,y,z

2 -x,-y,-z

loop\_

\_atom\_site\_label

\_atom\_site\_fract\_x

\_atom\_site\_fract\_y

\_atom\_site\_fract\_z

|      |         |         |          |      |
|------|---------|---------|----------|------|
| C1a  | 0.56257 | 0.14336 | -0.35200 | # 1  |
| C2a  | 0.67587 | 0.25612 | -0.30821 | # 2  |
| C3a  | 0.60055 | 0.33076 | -0.23963 | # 3  |
| C4a  | 0.40547 | 0.28874 | -0.21569 | # 4  |
| C5a  | 0.28528 | 0.17597 | -0.25766 | # 5  |
| C6a  | 0.36706 | 0.10523 | -0.32540 | # 6  |
| N7a  | 0.84949 | 0.27324 | -0.34277 | # 7  |
| O8a  | 0.83857 | 0.16441 | -0.41096 | # 8  |
| N9a  | 0.65926 | 0.09043 | -0.41203 | # 9  |
| N10a | 0.68321 | 0.43519 | -0.19322 | # 10 |
| O11a | 0.54898 | 0.46696 | -0.13711 | # 11 |
| N12a | 0.36655 | 0.37077 | -0.15187 | # 12 |
| N13a | 0.10593 | 0.12448 | -0.24405 | # 13 |
| O14a | 0.06085 | 0.01873 | -0.30123 | # 14 |
| N15a | 0.23236 | 0.00608 | -0.35466 | # 15 |
| O16a | 0.22887 | 0.38211 | -0.10820 | # 16 |
| O17a | 0.99791 | 0.35038 | -0.33149 | # 17 |

|      |          |          |          |      |
|------|----------|----------|----------|------|
| O18a | 0.22162  | -0.08239 | -0.40961 | # 18 |
| C1a  | -0.10904 | -0.62647 | 0.28002  | # 37 |
| C2a  | 0.07217  | -0.69077 | 0.26883  | # 38 |
| C3a  | 0.18426  | -0.73393 | 0.33377  | # 39 |
| C4a  | 0.10876  | -0.71057 | 0.41151  | # 40 |
| C5a  | -0.07283 | -0.64629 | 0.42602  | # 41 |
| C6a  | -0.17852 | -0.60535 | 0.35946  | # 42 |
| N7a  | 0.10785  | -0.69992 | 0.19184  | # 43 |
| O8a  | -0.06190 | -0.63747 | 0.15526  | # 44 |
| N9a  | -0.18627 | -0.59570 | 0.21314  | # 45 |
| N10a | 0.35091  | -0.79357 | 0.33412  | # 46 |
| O11a | 0.39329  | -0.81234 | 0.41094  | # 47 |
| N12a | 0.23424  | -0.75783 | 0.46177  | # 48 |
| N13a | -0.16225 | -0.61743 | 0.49255  | # 49 |
| O14a | -0.32899 | -0.55689 | 0.47360  | # 50 |
| N15a | -0.33969 | -0.54895 | 0.38619  | # 51 |
| O16a | 0.24467  | -0.76488 | 0.53240  | # 52 |
| O17a | 0.23551  | -0.74363 | 0.15005  | # 53 |
| O18a | -0.47778 | -0.49819 | 0.35735  | # 54 |
| C1   | 0.54781  | 0.23887  | 0.00276  | # 73 |
| C2   | 0.74142  | 0.25100  | -0.02672 | # 74 |
| C3   | 0.79006  | 0.16371  | -0.09175 | # 75 |
| C4   | 0.64568  | 0.06386  | -0.12770 | # 76 |
| C5   | 0.45362  | 0.05366  | -0.09729 | # 77 |
| C6   | 0.40171  | 0.13956  | -0.03252 | # 78 |
| H7   | 0.51041  | 0.30677  | 0.05326  | # 79 |
| H8   | 0.94050  | 0.17333  | -0.11453 | # 80 |
| N9   | 0.29989  | -0.05176 | -0.13499 | # 81 |
| O10  | 0.13136  | -0.05888 | -0.10715 | # 82 |
| O11  | 0.34910  | -0.12644 | -0.19210 | # 83 |
| H12  | 0.25039  | 0.12745  | -0.01116 | # 84 |
| H13  | 0.67841  | -0.00535 | -0.17815 | # 85 |
| H14  | 0.85462  | 0.32861  | 0.00104  | # 86 |

#END

data\_\_ BTF-nitrobenzene(3:1)\_\_\_\_-9.22013E+01  
 \_chemical\_name\_systematic  
 ;RAS b3lyp-d3

E(total)=-9.22013E+01 E(coul)=-1.98483E+01 E(vdW)=-7.23530E+01 Density= 1.79180  
 ;  
 \_cell\_length\_a 10.067  
 \_cell\_length\_b 24.066  
 \_cell\_length\_c 6.730

```

_cell_angle_alpha  90.00
_cell_angle_beta   91.24
_cell_angle_gamma  90.00
_cell_formula_units_Z  2
_symmetry_space_group_name_H-M 'P 21 '
_symmetry_Int_Tables_number  4
loop_
_symmetry_equiv_pos_as_xyz
  1 x,y,z
  2 -x,1/2+y,-z
loop_
_atom_site_label
_atom_site_fract_x
_atom_site_fract_y
_atom_site_fract_z
C1a  0.21699  0.03869 -0.28354      # 1
C2a  0.09375  0.01847 -0.21021      # 2
C3a  0.01140 -0.01993 -0.32126      # 3
C4a  0.05652 -0.03783 -0.51090      # 4
C5a  0.17974 -0.01876 -0.59156      # 5
C6a  0.25784  0.01937 -0.47526      # 6
N7a  0.07586  0.04142 -0.03298      # 7
O8a  0.19531  0.07732  0.00075      # 8
N9a  0.27562  0.07312 -0.15884      # 9
N10a -0.10285 -0.04236 -0.27698      # 10
O11a -0.13843 -0.07571 -0.43274      # 11
N12a -0.03376 -0.07273 -0.58639      # 12
N13a  0.23535 -0.03075 -0.76055      # 13
O14a  0.35125 -0.00161 -0.76438      # 14
N15a  0.36602  0.03131 -0.57700      # 15
O16a -0.04692 -0.09957 -0.73730      # 16
O17a -0.00808  0.03939  0.09249      # 17
O18a  0.46313  0.06018 -0.55156      # 18
C1a  0.68383  0.16437  0.27484      # 37
C2a  0.72516  0.10983  0.33375      # 38
C3a  0.70435  0.06201  0.20833      # 39
C4a  0.63996  0.07042  0.01918      # 40
C5a  0.59641  0.12443 -0.04727      # 41
C6a  0.61947  0.17056  0.08298      # 42
N7a  0.78157  0.11374  0.51379      # 43
O8a  0.77322  0.17406  0.56460      # 44
N9a  0.71246  0.20166  0.41112      # 45
N10a  0.73549  0.00977  0.23853      # 46
O11a  0.69388 -0.01855  0.07339      # 47
N12a  0.63114  0.02129 -0.07070      # 48
N13a  0.53664  0.13940 -0.21375      # 49
O14a  0.51748  0.19531 -0.20208      # 50

```

|      |          |          |          |      |
|------|----------|----------|----------|------|
| N15a | 0.57189  | 0.21579  | -0.00719 | # 51 |
| O16a | 0.58752  | 0.00419  | -0.22782 | # 52 |
| O17a | 0.83257  | 0.08196  | 0.63165  | # 53 |
| O18a | 0.56450  | 0.26467  | 0.03207  | # 54 |
| C1a  | -0.18589 | -0.21599 | 0.04656  | # 73 |
| C2a  | -0.28002 | -0.19954 | 0.19148  | # 74 |
| C3a  | -0.30175 | -0.23138 | 0.36897  | # 75 |
| C4a  | -0.22540 | -0.28096 | 0.39791  | # 76 |
| C5a  | -0.12940 | -0.29937 | 0.25671  | # 77 |
| C6a  | -0.11162 | -0.26624 | 0.08285  | # 78 |
| N7a  | -0.33654 | -0.15258 | 0.12861  | # 79 |
| O8a  | -0.27226 | -0.14048 | -0.06467 | # 80 |
| N9a  | -0.18216 | -0.18111 | -0.10278 | # 81 |
| N10a | -0.38292 | -0.22247 | 0.51527  | # 82 |
| O11a | -0.36458 | -0.26506 | 0.64625  | # 83 |
| N12a | -0.26113 | -0.30348 | 0.56917  | # 84 |
| N13a | -0.05196 | -0.34315 | 0.25976  | # 85 |
| O14a | 0.01980  | -0.34119 | 0.09066  | # 86 |
| N15a | -0.01937 | -0.29067 | -0.02555 | # 87 |
| O16a | -0.23035 | -0.34420 | 0.66463  | # 88 |
| O17a | -0.42008 | -0.12117 | 0.18928  | # 89 |
| O18a | 0.03339  | -0.28137 | -0.18166 | # 90 |
| C1   | -0.41563 | 0.38228  | 0.37558  | #109 |
| C2   | -0.36588 | 0.39563  | 0.18928  | #110 |
| C3   | -0.23912 | 0.37803  | 0.13657  | #111 |
| C4   | -0.16135 | 0.34701  | 0.26955  | #112 |
| C5   | -0.21301 | 0.33420  | 0.45448  | #113 |
| C6   | -0.33912 | 0.35130  | 0.51026  | #114 |
| H7   | -0.51409 | 0.39600  | 0.41616  | #115 |
| H8   | -0.20071 | 0.38844  | -0.00818 | #116 |
| N9   | -0.13135 | 0.30139  | 0.59614  | #117 |
| O10  | -0.17899 | 0.29056  | 0.75853  | #118 |
| O11  | -0.02034 | 0.28674  | 0.54370  | #119 |
| H12  | -0.37468 | 0.34026  | 0.65569  | #120 |
| H13  | -0.06280 | 0.33274  | 0.23339  | #121 |
| H14  | -0.42601 | 0.41979  | 0.08497  | #122 |

#END

### Simulated cocrystal structures of BTF-1,2-dinitrobenzene

data\_\_\_\_\_ BTF-1,2-dinitrobenzene(1:1)\_\_\_\_\_ -1.54400E+02  
 \_chemical\_name\_systematic  
 ;RAS b3lyp-d3

E(total)=-1.54400E+02 E(coul)=-1.64085E+02 E(vdW)=-3.07831E+01 Density= 1.79769

;

```

_cell_length_a 15.552
_cell_length_b 6.992
_cell_length_c 9.586
_cell_angle_alpha 90.00
_cell_angle_beta 48.14
_cell_angle_gamma 90.00
_cell_formula_units_Z 2
_symmetry_space_group_name_H-M 'P 21 '
_symmetry_Int_Tables_number 4
loop_
_symmetry_equiv_pos_as_xyz
  1 x,y,z
  2 -x,1/2+y,-z
loop_
_atom_site_label
_atom_site_fract_x
_atom_site_fract_y
_atom_site_fract_z
C1      0.24421 -0.17803 0.18787      # 1
C2      0.32748 -0.13979 0.20433      # 2
C3      0.32737 0.03554 0.28322      # 3
C4      0.24017 0.17386 0.34624      # 4
C5      0.15436 0.14249 0.33289      # 5
C6      0.15829 -0.03406 0.25342      # 6
N7      0.39760 -0.29010 0.13607      # 7
O8      0.35340 -0.42525 0.07566      # 8
N'9     0.26019 -0.34555 0.11235      # 9
N'10    0.39630 0.09317 0.30854      # 10
O11     0.35871 0.26978 0.38833      # 11
N12     0.25616 0.32278 0.41310      # 12
N'13    0.06945 0.25238 0.38309      # 13
O14     0.01383 0.15547 0.33999      # 14
N15     0.07218 -0.03268 0.25481      # 15
O16     0.20975 0.47540 0.48219      # 16
O17     0.48062 -0.33472 0.11525      # 17
O18     0.03556 -0.14068 0.20654      # 18
C1a     0.37251 0.05567 0.75385      # 37
C2a     0.31085 -0.05813 0.72793      # 38
C3a     0.20882 0.00968 0.77836      # 39
C4a     0.16952 0.19289 0.85120      # 40
C5a     0.23182 0.30786 0.87589      # 41
C6a     0.33269 0.23903 0.82835      # 42
H10a    0.45129 -0.00071 0.71352      # 43
H11a    0.38113 0.32799 0.84780      # 44
H12a    0.09017 0.24162 0.88898      # 45
H13a    0.20082 0.45051 0.93345      # 46
N7a     0.36204 -0.24381 0.63200      # 59

```



|      |         |          |         |      |
|------|---------|----------|---------|------|
| O8a  | 0.41745 | -0.32873 | 0.66192 | # 60 |
| O9a  | 0.34972 | -0.29387 | 0.52371 | # 61 |
| N14a | 0.14396 | -0.12502 | 0.76714 | # 66 |
| O15a | 0.13390 | -0.28658 | 0.82613 | # 67 |
| O16a | 0.10115 | -0.06621 | 0.70447 | # 68 |

#END

data\_BTF-1,2-dinitrobenzene(1:2)\_-6.71698E+01  
 \_chemical\_name\_systematic  
 ;RAS b3lyp-d3

E(total)=-6.71698E+01 E(coul)=-1.66468E+01 E(vdW)=-5.05229E+01 Density= 1.67703

;

\_cell\_length\_a 8.000  
 \_cell\_length\_b 11.995  
 \_cell\_length\_c 13.926  
 \_cell\_angle\_alpha 108.04  
 \_cell\_angle\_beta 101.05  
 \_cell\_angle\_gamma 105.87  
 \_cell\_formula\_units\_Z 2  
 \_symmetry\_space\_group\_name\_H-M 'P -1 '

\_symmetry\_Int\_Tables\_number 2

loop\_

\_symmetry\_equiv\_pos\_as\_xyz

1 x,y,z  
 2 -x,-y,-z

loop\_

\_atom\_site\_label  
 \_atom\_site\_fract\_x  
 \_atom\_site\_fract\_y  
 \_atom\_site\_fract\_z

|      |         |         |          |      |
|------|---------|---------|----------|------|
| C1   | 0.62504 | 0.51376 | -0.18748 | # 1  |
| C2   | 0.80999 | 0.54979 | -0.12589 | # 2  |
| C3   | 0.92004 | 0.47511 | -0.15346 | # 3  |
| C4   | 0.83854 | 0.36148 | -0.24592 | # 4  |
| C5   | 0.65300 | 0.32093 | -0.31066 | # 5  |
| C6   | 0.54956 | 0.39853 | -0.27979 | # 6  |
| N7   | 0.85094 | 0.65780 | -0.04541 | # 7  |
| O8   | 0.68054 | 0.68754 | -0.06010 | # 8  |
| N'9  | 0.55055 | 0.59509 | -0.14825 | # 9  |
| N'10 | 1.08950 | 0.49389 | -0.10654 | # 10 |
| O11  | 1.12793 | 0.39513 | -0.16474 | # 11 |
| N12  | 0.96310 | 0.30816 | -0.25629 | # 12 |
| N'13 | 0.55804 | 0.22083 | -0.39681 | # 13 |
| O14  | 0.38962 | 0.22714 | -0.42676 | # 14 |
| N15  | 0.38404 | 0.34385 | -0.34991 | # 15 |

|      |          |          |          |      |
|------|----------|----------|----------|------|
| O16  | 0.96943  | 0.21406  | -0.31788 | # 16 |
| O17  | 0.98331  | 0.72894  | 0.02898  | # 17 |
| O18  | 0.24536  | 0.36681  | -0.36270 | # 18 |
| C1a  | -0.04851 | -0.08653 | -0.37595 | # 37 |
| C2a  | -0.10456 | -0.20388 | -0.36989 | # 38 |
| C3a  | -0.00369 | -0.28196 | -0.39186 | # 39 |
| C4a  | 0.15547  | -0.24178 | -0.41780 | # 40 |
| C5a  | 0.21270  | -0.12361 | -0.42308 | # 41 |
| C6a  | 0.11043  | -0.04648 | -0.40280 | # 42 |
| H10a | -0.12947 | -0.02806 | -0.35852 | # 43 |
| H11a | 0.15444  | 0.04532  | -0.40708 | # 44 |
| H12a | 0.23089  | -0.30432 | -0.43440 | # 45 |
| H13a | 0.33653  | -0.09257 | -0.44375 | # 46 |
| N7a  | -0.26304 | -0.23657 | -0.33110 | # 57 |
| O8a  | -0.39010 | -0.20489 | -0.36197 | # 58 |
| O9a  | -0.25209 | -0.28775 | -0.26761 | # 59 |
| N14a | -0.06764 | -0.41208 | -0.39758 | # 63 |
| O15a | -0.23122 | -0.47261 | -0.43838 | # 64 |
| O16a | 0.04933  | -0.45114 | -0.36521 | # 65 |
| C1a  | -0.44013 | 0.12509  | 0.14180  | # 69 |
| C2a  | -0.49742 | 0.00950  | 0.15092  | # 70 |
| C3a  | -0.39176 | -0.06635 | 0.13780  | # 71 |
| C4a  | -0.22679 | -0.02562 | 0.11771  | # 72 |
| C5a  | -0.16840 | 0.09082  | 0.10938  | # 73 |
| C6a  | -0.27528 | 0.16566  | 0.12079  | # 74 |
| H10a | -0.52489 | 0.18185  | 0.15233  | # 75 |
| H11a | -0.23036 | 0.25610  | 0.11411  | # 76 |
| H12a | -0.14776 | -0.08642 | 0.10793  | # 77 |
| H13a | -0.04000 | 0.12228  | 0.09326  | # 78 |
| N7a  | -0.66319 | -0.02341 | 0.18346  | # 89 |
| O8a  | -0.78929 | 0.00466  | 0.14509  | # 90 |
| O9a  | -0.65904 | -0.07110 | 0.24963  | # 91 |
| N14a | -0.45569 | -0.19501 | 0.13547  | # 95 |
| O15a | -0.61746 | -0.25818 | 0.09003  | # 96 |
| O16a | -0.34001 | -0.23041 | 0.17521  | # 97 |
| #END |          |          |          |      |

data\_BTF-1,2-dinitrobenzene(1:3)\_-8.68657E+01

\_chemical\_name\_systematic

;RAS b3lyp-d3

E(total)=-8.68657E+01 E(coul)=-2.39434E+01 E(vdW)=-6.29223E+01 Density= 1.63144

;

\_cell\_length\_a 13.145

```

_cell_length_b 19.935
_cell_length_c 11.753
_cell_angle_alpha 90.00
_cell_angle_beta 90.00
_cell_angle_gamma 90.00
_cell_formula_units_Z 4
_symmetry_space_group_name_H-M 'P 212121'
_symmetry_Int_Tables_number 19
loop_
_symmetry_equiv_pos_as_xyz
  1 x,y,z
  2 1/2+x,1/2-y,-z
  3 -x,1/2+y,1/2-z
  4 1/2-x,-y,1/2+z
loop_
_atom_site_label
_atom_site_fract_x
_atom_site_fract_y
_atom_site_fract_z
C1 0.20309 -0.25493 0.12805 # 1
C2 0.16911 -0.19419 0.07556 # 2
C3 0.06343 -0.17531 0.07254 # 3
C4 -0.00852 -0.21963 0.12436 # 4
C5 0.02164 -0.28134 0.17831 # 5
C6 0.12757 -0.29776 0.17898 # 6
N7 0.25053 -0.16278 0.03457 # 7
O8 0.33780 -0.20744 0.06446 # 8
N'9 0.30199 -0.26218 0.12106 # 9
N'10 0.01964 -0.12222 0.02862 # 10
O11 -0.08190 -0.12868 0.04890 # 11
N12 -0.10040 -0.19265 0.11178 # 12
N'13 -0.03347 -0.32718 0.22922 # 13
O14 0.03225 -0.37546 0.26554 # 14
N15 0.13802 -0.35614 0.23254 # 15
O16 -0.18632 -0.20769 0.13797 # 16
O17 0.26654 -0.11117 -0.01631 # 17
O18 0.20794 -0.39271 0.25724 # 18
C1a 0.18234 0.04688 -0.00076 # 37
C2a 0.23538 0.09975 -0.05005 # 38
C3a 0.27846 0.14963 0.01819 # 39
C4a 0.27037 0.14600 0.13597 # 40
C5a 0.21786 0.09267 0.18562 # 41
C6a 0.17346 0.04346 0.11741 # 42
H10a 0.14974 0.00896 -0.05580 # 43
H11a 0.13241 0.00203 0.15580 # 44
H12a 0.30455 0.18538 0.18671 # 45
H13a 0.21125 0.09004 0.27751 # 46

```

|      |          |          |          |      |
|------|----------|----------|----------|------|
| N7a  | 0.25113  | 0.09750  | -0.17424 | # 57 |
| O8a  | 0.17936  | 0.07779  | -0.23212 | # 58 |
| O9a  | 0.33586  | 0.11265  | -0.20937 | # 59 |
| N14a | 0.32589  | 0.21027  | -0.03030 | # 63 |
| O15a | 0.28450  | 0.23519  | -0.11365 | # 64 |
| O16a | 0.40051  | 0.23263  | 0.01976  | # 65 |
| C1a  | 0.58683  | 0.13998  | 0.12586  | # 69 |
| C2a  | 0.56893  | 0.10990  | 0.02104  | # 70 |
| C3a  | 0.50751  | 0.05285  | 0.01372  | # 71 |
| C4a  | 0.46218  | 0.02659  | 0.11087  | # 72 |
| C5a  | 0.47942  | 0.05705  | 0.21601  | # 73 |
| C6a  | 0.54204  | 0.11337  | 0.22358  | # 74 |
| H10a | 0.63479  | 0.18414  | 0.12893  | # 75 |
| H11a | 0.55573  | 0.13705  | 0.30525  | # 76 |
| H12a | 0.41493  | -0.01766 | 0.10259  | # 77 |
| H13a | 0.44434  | 0.03636  | 0.29182  | # 78 |
| N7a  | 0.60973  | 0.14376  | -0.08076 | # 89 |
| O8a  | 0.69506  | 0.16831  | -0.07244 | # 90 |
| O9a  | 0.55361  | 0.14729  | -0.16382 | # 91 |
| N14a | 0.49505  | 0.01502  | -0.09322 | # 95 |
| O15a | 0.57062  | 0.00878  | -0.15338 | # 96 |
| O16a | 0.41100  | -0.00971 | -0.11099 | # 97 |
| C1a  | -0.06593 | 0.11422  | -0.08914 | #101 |
| C2a  | -0.06742 | 0.13287  | -0.20310 | #102 |
| C3a  | -0.12432 | 0.09600  | -0.28167 | #103 |
| C4a  | -0.18151 | 0.04123  | -0.24604 | #104 |
| C5a  | -0.18075 | 0.02277  | -0.13152 | #105 |
| C6a  | -0.12265 | 0.05893  | -0.05339 | #106 |
| H10a | -0.02111 | 0.14373  | -0.03017 | #107 |
| H11a | -0.12176 | 0.04459  | 0.03564  | #108 |
| H12a | -0.22490 | 0.01361  | -0.30886 | #109 |
| H13a | -0.22508 | -0.02014 | -0.10389 | #110 |
| N7a  | -0.01439 | 0.19540  | -0.23440 | #121 |
| O8a  | 0.06751  | 0.20615  | -0.18761 | #122 |
| O9a  | -0.05824 | 0.23302  | -0.30072 | #123 |
| N14a | -0.11977 | 0.10935  | -0.40499 | #127 |
| O15a | -0.03640 | 0.12380  | -0.44477 | #128 |
| O16a | -0.19905 | 0.10204  | -0.45879 | #129 |
| #END |          |          |          |      |

data\_ BTF-1,2-dinitrobenzene(2:1)\_-7.20949E+01  
\_chemical\_name\_systematic  
;RAS b3lyp-d3

E(total)=-7.20949E+01 E(coul)=-1.31887E+01 E(vdW)=-5.89061E+01 Density= 1.83958

;

\_cell\_length\_a 11.642

\_cell\_length\_b 6.925

\_cell\_length\_c 15.164

\_cell\_angle\_alpha 90.00

\_cell\_angle\_beta 83.13

\_cell\_angle\_gamma 90.00

\_cell\_formula\_units\_Z 2

\_symmetry\_space\_group\_name\_H-M 'P 21 '

\_symmetry\_Int\_Tables\_number 4

loop\_

\_symmetry\_equiv\_pos\_as\_xyz

1 x,y,z

2 -x,1/2+y,-z

loop\_

\_atom\_site\_label

\_atom\_site\_fract\_x

\_atom\_site\_fract\_y

\_atom\_site\_fract\_z

|      |          |          |         |      |
|------|----------|----------|---------|------|
| C1   | 0.27764  | -0.18024 | 0.14285 | # 1  |
| C2   | 0.35886  | -0.13571 | 0.20359 | # 2  |
| C3   | 0.35402  | 0.04194  | 0.25322 | # 3  |
| C4   | 0.26414  | 0.17604  | 0.24017 | # 4  |
| C5   | 0.18021  | 0.13829  | 0.17986 | # 5  |
| C6   | 0.18887  | -0.04033 | 0.13217 | # 6  |
| N7   | 0.43219  | -0.28314 | 0.20300 | # 7  |
| O8   | 0.39218  | -0.42315 | 0.13820 | # 8  |
| N'9  | 0.29795  | -0.34887 | 0.10494 | # 9  |
| N'10 | 0.42056  | 0.10513  | 0.31086 | # 10 |
| O11  | 0.37865  | 0.28146  | 0.33840 | # 11 |
| N12  | 0.27591  | 0.32804  | 0.29197 | # 12 |
| N'13 | 0.09336  | 0.24374  | 0.16013 | # 13 |
| O14  | 0.04104  | 0.14168  | 0.09933 | # 14 |
| N15  | 0.10376  | -0.04490 | 0.08096 | # 15 |
| O16  | 0.22595  | 0.47947  | 0.30742 | # 16 |
| O17  | 0.51541  | -0.32259 | 0.24010 | # 17 |
| O18  | 0.07050  | -0.15688 | 0.02841 | # 18 |
| C1   | -0.23129 | 0.31321  | 0.21821 | # 37 |
| C2   | -0.30465 | 0.35248  | 0.15114 | # 38 |
| C3   | -0.29736 | 0.52985  | 0.10124 | # 39 |
| C4   | -0.21321 | 0.66915  | 0.12065 | # 40 |
| C5   | -0.13728 | 0.63680  | 0.18748 | # 41 |
| C6   | -0.14806 | 0.45823  | 0.23515 | # 42 |
| N7   | -0.37392 | 0.20092  | 0.14667 | # 43 |
| O8   | -0.33969 | 0.06390  | 0.21501 | # 44 |
| N'9  | -0.25254 | 0.14385  | 0.25518 | # 45 |

|      |          |          |         |      |
|------|----------|----------|---------|------|
| N'10 | -0.35703 | 0.58864  | 0.03831 | # 46 |
| O11  | -0.31596 | 0.76702  | 0.01334 | # 47 |
| N12  | -0.22149 | 0.81991  | 0.06742 | # 48 |
| N'13 | -0.05635 | 0.74736  | 0.21345 | # 49 |
| O14  | -0.01028 | 0.64893  | 0.27859 | # 50 |
| N15  | -0.07051 | 0.45902  | 0.29285 | # 51 |
| O16  | -0.17347 | 0.97397  | 0.05523 | # 52 |
| O17  | -0.45047 | 0.15638  | 0.10337 | # 53 |
| O18  | -0.04198 | 0.34951  | 0.34834 | # 54 |
| C1a  | 0.36332  | 0.06558  | 0.57697 | # 73 |
| C2a  | 0.30815  | -0.05291 | 0.52115 | # 74 |
| C3a  | 0.20842  | 0.01079  | 0.48710 | # 75 |
| C4a  | 0.16504  | 0.19461  | 0.50733 | # 76 |
| C5a  | 0.22087  | 0.31429  | 0.56278 | # 77 |
| C6a  | 0.31936  | 0.24954  | 0.59791 | # 78 |
| H10a | 0.44045  | 0.01231  | 0.60238 | # 79 |
| H11a | 0.36276  | 0.34217  | 0.64118 | # 80 |
| H12a | 0.08761  | 0.24009  | 0.47996 | # 81 |
| H13a | 0.18667  | 0.45741  | 0.57881 | # 82 |
| N7a  | 0.36442  | -0.23794 | 0.49412 | # 93 |
| O8a  | 0.40861  | -0.32710 | 0.55140 | # 94 |
| O9a  | 0.36707  | -0.28387 | 0.41585 | # 95 |
| N14a | 0.13994  | -0.11662 | 0.43553 | # 99 |
| O15a | 0.12893  | -0.28507 | 0.45987 | #100 |
| O16a | 0.09520  | -0.04163 | 0.37469 | #101 |
| #END |          |          |         |      |

data\_BTF-1,2-dinitrobenzene(3:1)\_{-9.55479E+01

\_chemical\_name\_systematic

;RAS b3lyp-d3

E(total)=-9.55479E+01 E(coul)=-2.39337E+01 E(vdW)=-7.16142E+01 Density= 1.77657

;

\_cell\_length\_a 13.546

\_cell\_length\_b 18.944

\_cell\_length\_c 6.747

\_cell\_angle\_alpha 90.00

\_cell\_angle\_beta 86.54

\_cell\_angle\_gamma 90.00

\_cell\_formula\_units\_Z 2

\_symmetry\_space\_group\_name\_H-M 'P 21'

\_symmetry\_Int\_Tables\_number 4

loop\_

\_symmetry\_equiv\_pos\_as\_xyz

1 x,y,z

$2-x, 1/2+y, -z$   
loop\_  
\_atom\_site\_label  
\_atom\_site\_fract\_x  
\_atom\_site\_fract\_y  
\_atom\_site\_fract\_z

|      |          |          |          |      |
|------|----------|----------|----------|------|
| C1   | -0.22747 | -0.07136 | -0.36919 | # 1  |
| C2   | -0.27372 | -0.05857 | -0.17632 | # 2  |
| C3   | -0.28972 | 0.01165  | -0.09923 | # 3  |
| C4   | -0.25763 | 0.06967  | -0.22255 | # 4  |
| C5   | -0.21071 | 0.05971  | -0.41776 | # 5  |
| C6   | -0.19655 | -0.01111 | -0.48732 | # 6  |
| N7   | -0.29595 | -0.12088 | -0.09439 | # 7  |
| O8   | -0.26088 | -0.17366 | -0.24741 | # 8  |
| N'9  | -0.22033 | -0.13892 | -0.40929 | # 9  |
| N'10 | -0.33039 | 0.03264  | 0.07190  | # 10 |
| O11  | -0.32726 | 0.10449  | 0.07032  | # 11 |
| N12  | -0.27948 | 0.12882  | -0.12308 | # 12 |
| N'13 | -0.17718 | 0.10629  | -0.54880 | # 13 |
| O14  | -0.13976 | 0.06916  | -0.70909 | # 14 |
| N15  | -0.15248 | -0.00794 | -0.66872 | # 15 |
| O16  | -0.26963 | 0.19134  | -0.15386 | # 16 |
| O17  | -0.33448 | -0.14126 | 0.06143  | # 17 |
| O18  | -0.12379 | -0.05008 | -0.79375 | # 18 |
| C1   | 0.06408  | 0.29147  | 0.83081  | # 37 |
| C2   | 0.05587  | 0.25779  | 0.64277  | # 38 |
| C3   | -0.03360 | 0.26028  | 0.53810  | # 39 |
| C4   | -0.11599 | 0.29805  | 0.62831  | # 40 |
| C5   | -0.11163 | 0.33287  | 0.81728  | # 41 |
| C6   | -0.02103 | 0.32878  | 0.91511  | # 42 |
| N7   | 0.14207  | 0.22688  | 0.59362  | # 43 |
| O8   | 0.20502  | 0.24315  | 0.76214  | # 44 |
| N'9  | 0.15172  | 0.28256  | 0.89934  | # 45 |
| N'10 | -0.05365 | 0.23277  | 0.36688  | # 46 |
| O11  | -0.14885 | 0.25068  | 0.33579  | # 47 |
| N12  | -0.18980 | 0.29356  | 0.50749  | # 48 |
| N'13 | -0.17922 | 0.36929  | 0.91996  | # 49 |
| O14  | -0.13732 | 0.39079  | 1.08826  | # 50 |
| N15  | -0.03342 | 0.36419  | 1.08508  | # 51 |
| O16  | -0.27396 | 0.31476  | 0.50823  | # 52 |
| O17  | 0.17610  | 0.19214  | 0.45563  | # 53 |
| O18  | 0.01672  | 0.37772  | 1.22233  | # 54 |
| C1   | 0.43461  | -0.11772 | 0.11199  | # 73 |
| C2   | 0.43996  | -0.19202 | 0.07516  | # 74 |
| C3   | 0.48209  | -0.24038 | 0.21139  | # 75 |
| C4   | 0.51934  | -0.21186 | 0.38843  | # 76 |
| C5   | 0.51575  | -0.13752 | 0.43262  | # 77 |

|      |          |          |          |      |
|------|----------|----------|----------|------|
| C6   | 0.47315  | -0.09174 | 0.29240  | # 78 |
| N7   | 0.40062  | -0.20415 | -0.09755 | # 79 |
| O8   | 0.37019  | -0.13298 | -0.16717 | # 80 |
| N'9  | 0.39363  | -0.08366 | -0.03085 | # 81 |
| N'10 | 0.49277  | -0.30907 | 0.20107  | # 82 |
| O11  | 0.53693  | -0.32910 | 0.36822  | # 83 |
| N12  | 0.55438  | -0.26525 | 0.49129  | # 84 |
| N'13 | 0.54606  | -0.10289 | 0.58577  | # 85 |
| O14  | 0.52534  | -0.03354 | 0.55495  | # 86 |
| N15  | 0.47745  | -0.02622 | 0.36226  | # 87 |
| O16  | 0.59319  | -0.27191 | 0.64685  | # 88 |
| O17  | 0.38608  | -0.25537 | -0.19851 | # 89 |
| O18  | 0.45319  | 0.03165  | 0.30765  | # 90 |
| C1a  | 0.14842  | 0.11406  | 0.03285  | #109 |
| C2a  | 0.10398  | 0.08123  | -0.12310 | #110 |
| C3a  | 0.16140  | 0.04434  | -0.26760 | #111 |
| C4a  | 0.26312  | 0.03896  | -0.25419 | #112 |
| C5a  | 0.30775  | 0.07139  | -0.09687 | #113 |
| C6a  | 0.25062  | 0.10918  | 0.04564  | #114 |
| H10a | 0.10204  | 0.14231  | 0.14265  | #115 |
| H11a | 0.28517  | 0.13457  | 0.16784  | #116 |
| H12a | 0.30574  | 0.01000  | -0.36835 | #117 |
| H13a | 0.38719  | 0.06740  | -0.08701 | #118 |
| N7a  | -0.00499 | 0.08207  | -0.11902 | #129 |
| O8a  | -0.04611 | 0.13709  | -0.06447 | #130 |
| O9a  | -0.04597 | 0.02694  | -0.16193 | #131 |
| N14a | 0.11929  | 0.01513  | -0.44672 | #135 |
| O15a | 0.05660  | 0.05081  | -0.52391 | #136 |
| O16a | 0.15356  | -0.04117 | -0.50921 | #137 |
| #END |          |          |          |      |

### Simulated cocrystal structures of BTF-1,3-dinitrobenzene

data\_\_ BTF-1,3-dinitrobenzene(1:1)\_\_\_ -4.51596E+01

\_chemical\_name\_systematic

;RAS m-dnb-d3

E(total)=-4.51596E+01 E(coul)=-1.75047E+01 E(vdW)=-2.81362E+01 Density= 1.75265

;

\_cell\_length\_a 7.417

\_cell\_length\_b 17.617

\_cell\_length\_c 12.200

\_cell\_angle\_alpha 90.00

\_cell\_angle\_beta 87.46

\_cell\_angle\_gamma 90.00

\_cell\_formula\_units\_Z 4

\_symmetry\_space\_group\_name\_H-M 'P 21/C '



\_symmetry\_Int\_Tables\_number 14

loop\_

\_symmetry\_equiv\_pos\_as\_xyz

1 x,y,z

2 -x,1/2+y,1/2-z

3 -x,-y,-z

4 x,1/2-y,1/2+z

loop\_

\_atom\_site\_label

\_atom\_site\_fract\_x

\_atom\_site\_fract\_y

\_atom\_site\_fract\_z

|      |          |          |          |      |
|------|----------|----------|----------|------|
| C1   | 0.18026  | -0.32365 | -0.08362 | # 1  |
| C2   | 0.13969  | -0.38283 | -0.00613 | # 2  |
| C3   | -0.03179 | -0.38775 | 0.05354  | # 3  |
| C4   | -0.16377 | -0.33086 | 0.03318  | # 4  |
| C5   | -0.12983 | -0.27010 | -0.04394 | # 5  |
| C6   | 0.04271  | -0.26782 | -0.10107 | # 6  |
| N7   | 0.28405  | -0.42747 | -0.00308 | # 7  |
| O8   | 0.41791  | -0.39278 | -0.08335 | # 8  |
| N'9  | 0.34350  | -0.33003 | -0.12834 | # 9  |
| N'10 | -0.09078 | -0.43748 | 0.12655  | # 10 |
| O11  | -0.26209 | -0.41628 | 0.15763  | # 11 |
| N12  | -0.31004 | -0.34625 | 0.09631  | # 12 |
| N'13 | -0.23409 | -0.21399 | -0.07222 | # 13 |
| O14  | -0.13719 | -0.17244 | -0.14830 | # 14 |
| N15  | 0.04462  | -0.20779 | -0.16725 | # 15 |
| O16  | -0.45755 | -0.31823 | 0.11240  | # 16 |
| O17  | 0.32454  | -0.48411 | 0.04599  | # 17 |
| O18  | 0.15164  | -0.17916 | -0.23241 | # 18 |
| C1a  | 0.50994  | -0.11500 | 0.14397  | # 37 |
| C2a  | 0.36395  | -0.07258 | 0.11098  | # 38 |
| C3a  | 0.36114  | 0.00650  | 0.11524  | # 39 |
| C4a  | 0.51034  | 0.04454  | 0.15404  | # 40 |
| C5a  | 0.65933  | 0.00392  | 0.18788  | # 41 |
| C6a  | 0.65613  | -0.07510 | 0.18216  | # 42 |
| H13a | 0.50979  | -0.17631 | 0.14010  | # 43 |
| H14a | 0.24370  | 0.03661  | 0.08844  | # 44 |
| H15a | 0.51049  | 0.10604  | 0.15792  | # 45 |
| H16a | 0.77692  | 0.03200  | 0.21834  | # 46 |
| N7a  | 0.20576  | -0.11318 | 0.06970  | # 59 |
| O9a  | 0.08654  | -0.07463 | 0.03037  | # 60 |
| O10a | 0.20425  | -0.18269 | 0.07741  | # 61 |
| N8a  | 0.81421  | -0.11842 | 0.21802  | # 66 |
| O11a | 0.81336  | -0.18745 | 0.20406  | # 67 |
| O12a | 0.93583  | -0.08240 | 0.25935  | # 68 |

#END

data\_BTF-1,3-dinitrobenzene(1:2)\_-6.77830E+01  
\_chemical\_name\_systematic  
;RAS m-dnb-d3

E(total)=-6.77830E+01 E(coul)=-1.61926E+01 E(vdW)=-5.15904E+01 Density= 1.70270

;

\_cell\_length\_a 9.025

\_cell\_length\_b 9.056

\_cell\_length\_c 14.264

\_cell\_angle\_alpha 91.04

\_cell\_angle\_beta 96.43

\_cell\_angle\_gamma 97.59

\_cell\_formula\_units\_Z 2

\_symmetry\_space\_group\_name\_H-M 'P -1'

\_symmetry\_Int\_Tables\_number 2

loop\_

\_symmetry\_equiv\_pos\_as\_xyz

1 x,y,z

2 -x,-y,-z

loop\_

\_atom\_site\_label

\_atom\_site\_fract\_x

\_atom\_site\_fract\_y

\_atom\_site\_fract\_z

|      |          |          |          |      |
|------|----------|----------|----------|------|
| C1   | -0.09141 | 0.05695  | -0.33534 | # 1  |
| C2   | 0.06695  | 0.05676  | -0.31234 | # 2  |
| C3   | 0.12978  | 0.00136  | -0.22475 | # 3  |
| C4   | 0.02804  | -0.05477 | -0.15973 | # 4  |
| C5   | -0.13227 | -0.05711 | -0.17942 | # 5  |
| C6   | -0.18890 | -0.00079 | -0.26743 | # 6  |
| N7   | 0.13471  | 0.11424  | -0.38415 | # 7  |
| O8   | 0.00937  | 0.15062  | -0.45373 | # 8  |
| N'9  | -0.12387 | 0.11214  | -0.41828 | # 9  |
| N'10 | 0.27022  | -0.00700 | -0.19273 | # 10 |
| O11  | 0.26840  | -0.06815 | -0.10626 | # 11 |
| N12  | 0.10934  | -0.09952 | -0.08458 | # 12 |
| N'13 | -0.24025 | -0.10394 | -0.12849 | # 13 |
| O14  | -0.37168 | -0.08127 | -0.17951 | # 14 |
| N15  | -0.33795 | -0.01352 | -0.27077 | # 15 |
| O16  | 0.08360  | -0.15435 | -0.01051 | # 16 |
| O17  | 0.26287  | 0.14019  | -0.40255 | # 17 |
| O18  | -0.44037 | 0.01537  | -0.32644 | # 18 |
| C1a  | 0.21781  | -0.50809 | 0.00415  | # 37 |
| C2a  | 0.26220  | -0.40455 | 0.07843  | # 38 |
| C3a  | 0.38034  | -0.28919 | 0.07617  | # 39 |

|      |         |          |          |      |
|------|---------|----------|----------|------|
| C4a  | 0.45695 | -0.27709 | -0.00357 | # 40 |
| C5a  | 0.41566 | -0.37889 | -0.07950 | # 41 |
| C6a  | 0.29680 | -0.49244 | -0.07411 | # 42 |
| H13a | 0.12590 | -0.59687 | 0.00712  | # 43 |
| H14a | 0.41003 | -0.21172 | 0.13611  | # 44 |
| H15a | 0.54913 | -0.18805 | -0.00655 | # 45 |
| H16a | 0.47318 | -0.37212 | -0.14226 | # 46 |
| N7a  | 0.18075 | -0.41770 | 0.16284  | # 57 |
| O9a  | 0.22209 | -0.32482 | 0.22758  | # 58 |
| O10a | 0.07724 | -0.52043 | 0.16275  | # 59 |
| N8a  | 0.25273 | -0.60054 | -0.15447 | # 63 |
| O11a | 0.14765 | -0.69929 | -0.14765 | # 64 |
| O12a | 0.32428 | -0.58437 | -0.22285 | # 65 |
| C1a  | 0.21798 | -0.50579 | -0.49445 | # 69 |
| C2a  | 0.23353 | -0.39527 | -0.42379 | # 70 |
| C3a  | 0.33731 | -0.26655 | -0.42271 | # 71 |
| C4a  | 0.42902 | -0.24782 | -0.49521 | # 72 |
| C5a  | 0.41668 | -0.35629 | -0.56734 | # 73 |
| C6a  | 0.31131 | -0.48321 | -0.56550 | # 74 |
| H13a | 0.13687 | -0.60493 | -0.49416 | # 75 |
| H14a | 0.34451 | -0.18414 | -0.36586 | # 76 |
| H15a | 0.51037 | -0.14839 | -0.49551 | # 77 |
| H16a | 0.48644 | -0.34462 | -0.62447 | # 78 |
| N7a  | 0.13614 | -0.41548 | -0.34704 | # 89 |
| O9a  | 0.15202 | -0.31622 | -0.28539 | # 90 |
| O10a | 0.04586 | -0.52997 | -0.34992 | # 91 |
| N8a  | 0.29793 | -0.59840 | -0.64185 | # 95 |
| O11a | 0.20413 | -0.70891 | -0.63830 | # 96 |
| O12a | 0.38168 | -0.57588 | -0.70387 | # 97 |
| #END |         |          |          |      |

data\_ BTF-1,3-dinitrobenzene(1:3)\_-8.51619E+01

\_chemical\_name\_systematic

;RAS m-dnb-d3

E(total)=-8.51619E+01 E(coul)=-1.86548E+01 E(vdW)=-6.65072E+01 Density= 1.65493

;

\_cell\_length\_a 11.880

\_cell\_length\_b 20.707

\_cell\_length\_c 6.197

\_cell\_angle\_alpha 90.00

\_cell\_angle\_beta 84.78

\_cell\_angle\_gamma 90.00

\_cell\_formula\_units\_Z 2

\_symmetry\_space\_group\_name\_H-M 'P 21'

\_symmetry\_Int\_Tables\_number 4

```

loop_
_symmetry_equiv_pos_as_xyz
  1 x,y,z
  2 -x,1/2+y,-z
loop_
_atom_site_label
_atom_site_fract_x
_atom_site_fract_y
_atom_site_fract_z
C1      0.74589  0.48591  0.04567      # 1
C2      0.74733  0.52380  0.23839      # 2
C3      0.65863  0.56881  0.30577      # 3
C4      0.56693  0.57496  0.17274      # 4
C5      0.56138  0.53797 -0.02276      # 5
C6      0.65165  0.49394 -0.08245      # 6
N7      0.84084  0.50882  0.33029      # 7
O8      0.89815  0.45920  0.18369      # 8
N'9     0.83459  0.44826  0.01521      # 9
N'10    0.64669  0.60685  0.47534      # 10
O11     0.54800  0.63956  0.46311      # 11
N12     0.49561  0.61861  0.26436      # 12
N'13    0.48462  0.53759 -0.16187      # 13
O14     0.51975  0.49394 -0.31812      # 14
N15     0.62946  0.46527 -0.26596      # 15
O16     0.40685  0.64218  0.22404      # 16
O17     0.88412  0.52534  0.49053      # 17
O18     0.67494  0.42518 -0.38589      # 18
C1a     -0.19359  0.04182 -0.20316      # 37
C2a     -0.23672 -0.00718 -0.06636      # 38
C3a     -0.19411 -0.02052  0.13118      # 39
C4a     -0.10486  0.01666  0.19410      # 40
C5a     -0.05935  0.06625  0.06114      # 41
C6a     -0.10468  0.07784 -0.13499      # 42
H13a    -0.22769  0.05149 -0.35583      # 43
H14a    -0.23104 -0.05930  0.23122      # 44
H15a    -0.07065  0.00696  0.34722      # 45
H16a     0.00994  0.09585  0.10598      # 46
N7a     -0.33133 -0.04650 -0.13355      # 57
O9a     -0.36801 -0.08954 -0.00984      # 58
O10a    -0.36704 -0.03361 -0.30836      # 59
N8a     -0.05664  0.13036 -0.27631      # 63
O11a    -0.09833  0.13941 -0.44800      # 64
O12a     0.02192  0.16152 -0.21249      # 65
C1a     0.38133  0.25570  0.17870      # 69
C2a     0.28594  0.23301  0.30206      # 70
C3a     0.25565  0.25422  0.51289      # 71
C4a     0.32353  0.29992  0.60362      # 72

```

|      |          |         |          |      |
|------|----------|---------|----------|------|
| C5a  | 0.41991  | 0.32381 | 0.48484  | # 73 |
| C6a  | 0.44690  | 0.30120 | 0.27457  | # 74 |
| H13a | 0.40354  | 0.23871 | 0.01539  | # 75 |
| H14a | 0.18038  | 0.23486 | 0.60143  | # 76 |
| H15a | 0.30126  | 0.31696 | 0.76741  | # 77 |
| H16a | 0.47411  | 0.35930 | 0.55127  | # 78 |
| N7a  | 0.21418  | 0.18458 | 0.20539  | # 89 |
| O9a  | 0.13030  | 0.16526 | 0.31768  | # 90 |
| O10a | 0.24303  | 0.16684 | 0.01944  | # 91 |
| N8a  | 0.54900  | 0.32643 | 0.14822  | # 95 |
| O11a | 0.57056  | 0.30561 | -0.03648 | # 96 |
| O12a | 0.60559  | 0.36663 | 0.23652  | # 97 |
| C1a  | -0.08585 | 0.28333 | -0.75691 | #101 |
| C2a  | -0.18742 | 0.25870 | -0.66222 | #102 |
| C3a  | -0.22984 | 0.27421 | -0.45142 | #103 |
| C4a  | -0.16813 | 0.31600 | -0.33085 | #104 |
| C5a  | -0.06585 | 0.34168 | -0.42035 | #105 |
| C6a  | -0.02673 | 0.32481 | -0.63177 | #106 |
| H13a | -0.05423 | 0.27077 | -0.92065 | #107 |
| H14a | -0.30948 | 0.25357 | -0.38598 | #108 |
| H15a | -0.19985 | 0.32859 | -0.16662 | #109 |
| H16a | -0.01622 | 0.37423 | -0.33041 | #110 |
| N7a  | -0.25262 | 0.21441 | -0.79048 | #121 |
| O9a  | -0.34217 | 0.19327 | -0.70320 | #122 |
| O10a | -0.21310 | 0.20166 | -0.97560 | #123 |
| N8a  | 0.08166  | 0.35195 | -0.72714 | #127 |
| O11a | 0.11391  | 0.33620 | -0.91364 | #128 |
| O12a | 0.13236  | 0.38851 | -0.61329 | #129 |
| #END |          |         |          |      |

data\_ BTF-1,3-dinitrobenzene(2:1)\_-7.25939E+01

\_chemical\_name\_systematic

;RAS m-dnb-d3

E(total)=-7.25939E+01 E(coul)=-1.65524E+01 E(vdW)=-5.60415E+01 Density= 1.80730

;

\_cell\_length\_a 7.084

\_cell\_length\_b 18.464

\_cell\_length\_c 18.907

\_cell\_angle\_alpha 90.00

\_cell\_angle\_beta 92.29

\_cell\_angle\_gamma 90.00

\_cell\_formula\_units\_Z 4

\_symmetry\_space\_group\_name\_H-M 'P 21/C '

\_symmetry\_Int\_Tables\_number 14

loop\_  
\_symmetry\_equiv\_pos\_as\_xyz

- 1 x,y,z
- 2 -x,1/2+y,1/2-z
- 3 -x,-y,-z
- 4 x,1/2-y,1/2+z

loop\_

\_atom\_site\_label  
\_atom\_site\_fract\_x  
\_atom\_site\_fract\_y  
\_atom\_site\_fract\_z

|      |          |         |         |      |
|------|----------|---------|---------|------|
| C1   | 0.76231  | 0.61102 | 0.24968 | # 1  |
| C2   | 0.78731  | 0.64193 | 0.18132 | # 2  |
| C3   | 0.64317  | 0.63826 | 0.12555 | # 3  |
| C4   | 0.47043  | 0.60221 | 0.14032 | # 4  |
| C5   | 0.43806  | 0.57019 | 0.20821 | # 5  |
| C6   | 0.58579  | 0.57533 | 0.26180 | # 6  |
| N7   | 0.95833  | 0.67173 | 0.18188 | # 7  |
| O8   | 1.03943  | 0.65769 | 0.25475 | # 8  |
| N'9  | 0.91079  | 0.62056 | 0.29226 | # 9  |
| N'10 | 0.64252  | 0.66331 | 0.06068 | # 10 |
| O11  | 0.47193  | 0.64535 | 0.02979 | # 11 |
| N12  | 0.35889  | 0.60522 | 0.08210 | # 12 |
| N'13 | 0.29022  | 0.53559 | 0.23051 | # 13 |
| O14  | 0.33217  | 0.51642 | 0.29890 | # 14 |
| N15  | 0.52630  | 0.54252 | 0.31945 | # 15 |
| O16  | 0.20204  | 0.58440 | 0.06480 | # 16 |
| O17  | 1.05125  | 0.70426 | 0.14008 | # 17 |
| O18  | 0.59024  | 0.53082 | 0.37856 | # 18 |
| C1   | -0.04018 | 0.28720 | 0.07039 | # 37 |
| C2   | -0.17881 | 0.23512 | 0.08936 | # 38 |
| C3   | -0.35226 | 0.25567 | 0.12111 | # 39 |
| C4   | -0.38367 | 0.33105 | 0.13356 | # 40 |
| C5   | -0.24877 | 0.38566 | 0.11547 | # 41 |
| C6   | -0.07873 | 0.36236 | 0.08405 | # 42 |
| N7   | -0.11486 | 0.16994 | 0.07226 | # 43 |
| O8   | 0.07243  | 0.18417 | 0.04139 | # 44 |
| N'9  | 0.10633  | 0.25678 | 0.04235 | # 45 |
| N'10 | -0.49275 | 0.21559 | 0.14152 | # 46 |
| O11  | -0.62210 | 0.26175 | 0.16808 | # 47 |
| N12  | -0.55046 | 0.33758 | 0.16285 | # 48 |
| N'13 | -0.25480 | 0.45616 | 0.12310 | # 49 |
| O14  | -0.09155 | 0.48261 | 0.09749 | # 50 |
| N15  | 0.02410  | 0.42100 | 0.07185 | # 51 |
| O16  | -0.64540 | 0.38692 | 0.18379 | # 52 |
| O17  | -0.17116 | 0.10835 | 0.07619 | # 53 |
| O18  | 0.17535  | 0.43326 | 0.04698 | # 54 |

|      |          |         |          |      |
|------|----------|---------|----------|------|
| C1a  | 0.25213  | 0.15775 | -0.16034 | # 73 |
| C2a  | 0.08734  | 0.11766 | -0.15471 | # 74 |
| C3a  | 0.06171  | 0.06870 | -0.09979 | # 75 |
| C4a  | 0.20676  | 0.05954 | -0.04852 | # 76 |
| C5a  | 0.37417  | 0.09880 | -0.05238 | # 77 |
| C6a  | 0.39351  | 0.14716 | -0.10827 | # 78 |
| H13a | 0.26957  | 0.19549 | -0.20331 | # 79 |
| H14a | -0.06970 | 0.03893 | -0.09808 | # 80 |
| H15a | 0.18927  | 0.02169 | -0.00542 | # 81 |
| H16a | 0.48903  | 0.09276 | -0.01331 | # 82 |
| N7a  | -0.06612 | 0.12750 | -0.20915 | # 93 |
| O9a  | -0.21043 | 0.09145 | -0.20302 | # 94 |
| O10a | -0.03939 | 0.17100 | -0.25686 | # 95 |
| N8a  | 0.57078  | 0.18886 | -0.11252 | # 99 |
| O11a | 0.58364  | 0.23102 | -0.16234 | #100 |
| O12a | 0.69367  | 0.17855 | -0.06586 | #101 |
| #END |          |         |          |      |

data\_ BTF-1,3-dinitrobenzene(3:1)\_-9.68200E+01  
 \_chemical\_name\_systematic  
 ;RAS m-dnb-d3

E(total)=-9.68200E+01 E(coul)=-2.18265E+01 E(vdW)=-7.49935E+01 Density= 1.80997

;

\_cell\_length\_a 6.854  
 \_cell\_length\_b 11.885  
 \_cell\_length\_c 10.467  
 \_cell\_angle\_alpha 89.55  
 \_cell\_angle\_beta 95.52  
 \_cell\_angle\_gamma 92.10  
 \_cell\_formula\_units\_Z 1  
 \_symmetry\_space\_group\_name\_H-M 'P 1'  
 \_symmetry\_Int\_Tables\_number 1  
 loop\_  
 \_symmetry\_equiv\_pos\_as\_xyz  
 1 x,y,z  
 loop\_  
 \_atom\_site\_label  
 \_atom\_site\_fract\_x  
 \_atom\_site\_fract\_y  
 \_atom\_site\_fract\_z

|    |         |         |          |     |
|----|---------|---------|----------|-----|
| C1 | 0.26776 | 0.48182 | 0.01351  | # 1 |
| C2 | 0.36757 | 0.39859 | -0.05064 | # 2 |
| C3 | 0.55129 | 0.42315 | -0.10289 | # 3 |
| C4 | 0.63375 | 0.53519 | -0.08893 | # 4 |

|      |          |          |          |      |
|------|----------|----------|----------|------|
| C5   | 0.53932  | 0.62208  | -0.02522 | # 5  |
| C6   | 0.35706  | 0.59329  | 0.02497  | # 6  |
| N7   | 0.26028  | 0.30304  | -0.05020 | # 7  |
| O8   | 0.08691  | 0.33122  | 0.01813  | # 8  |
| N'9  | 0.10360  | 0.44147  | 0.05338  | # 9  |
| N'10 | 0.66115  | 0.35786  | -0.16375 | # 10 |
| O11  | 0.81932  | 0.42247  | -0.19264 | # 11 |
| N12  | 0.80133  | 0.53894  | -0.14350 | # 12 |
| N'13 | 0.59362  | 0.72773  | -0.00423 | # 13 |
| O14  | 0.45214  | 0.77337  | 0.05991  | # 14 |
| N15  | 0.29675  | 0.68507  | 0.07910  | # 15 |
| O16  | 0.92805  | 0.60958  | -0.15965 | # 16 |
| O17  | 0.27305  | 0.20851  | -0.08947 | # 17 |
| O18  | 0.15727  | 0.70897  | 0.13452  | # 18 |
| C1   | -0.01051 | -0.63757 | 0.50439  | # 37 |
| C2   | -0.13078 | -0.72798 | 0.54832  | # 38 |
| C3   | -0.32935 | -0.74999 | 0.49382  | # 39 |
| C4   | -0.40550 | -0.67782 | 0.39244  | # 40 |
| C5   | -0.29066 | -0.58567 | 0.34467  | # 41 |
| C6   | -0.09424 | -0.56743 | 0.40212  | # 42 |
| N7   | -0.02526 | -0.78108 | 0.64198  | # 43 |
| O8   | 0.16871  | -0.71860 | 0.65431  | # 44 |
| N'9  | 0.16455  | -0.63286 | 0.56711  | # 45 |
| N'10 | -0.45836 | -0.82811 | 0.52212  | # 46 |
| O11  | -0.62373 | -0.81176 | 0.44210  | # 47 |
| N12  | -0.58902 | -0.71305 | 0.35692  | # 48 |
| N'13 | -0.33671 | -0.51226 | 0.25365  | # 49 |
| O14  | -0.17550 | -0.44287 | 0.24647  | # 50 |
| N15  | -0.01624 | -0.47910 | 0.34398  | # 51 |
| O16  | -0.71908 | -0.68461 | 0.27844  | # 52 |
| O17  | -0.05143 | -0.86079 | 0.71147  | # 53 |
| O18  | 0.13998  | -0.42784 | 0.35297  | # 54 |
| C1   | 0.39523  | -0.09716 | 0.37631  | # 73 |
| C2   | 0.53906  | -0.18175 | 0.38951  | # 74 |
| C3   | 0.52545  | -0.27557 | 0.47647  | # 75 |
| C4   | 0.36119  | -0.28249 | 0.55110  | # 76 |
| C5   | 0.21235  | -0.19962 | 0.54148  | # 77 |
| C6   | 0.23279  | -0.10809 | 0.45365  | # 78 |
| N7   | 0.67415  | -0.15525 | 0.31011  | # 79 |
| O8   | 0.60659  | -0.04884 | 0.24615  | # 80 |
| N'9  | 0.43621  | -0.01975 | 0.29212  | # 81 |
| N'10 | 0.64254  | -0.35951 | 0.50028  | # 82 |
| O11  | 0.56277  | -0.42515 | 0.59046  | # 83 |
| N12  | 0.37797  | -0.37456 | 0.62384  | # 84 |
| N'13 | 0.05428  | -0.19308 | 0.60185  | # 85 |
| O14  | -0.03632 | -0.09836 | 0.55764  | # 86 |
| N15  | 0.08092  | -0.04253 | 0.46030  | # 87 |



|      |          |          |          |      |
|------|----------|----------|----------|------|
| O16  | 0.28451  | -0.42056 | 0.70274  | # 88 |
| O17  | 0.82389  | -0.19529 | 0.28224  | # 89 |
| O18  | 0.02464  | 0.04351  | 0.40927  | # 90 |
| C1a  | -0.30607 | 0.04401  | -0.03342 | #109 |
| C2a  | -0.24338 | -0.04135 | -0.10796 | #110 |
| C3a  | -0.05311 | -0.08024 | -0.09126 | #111 |
| C4a  | 0.07946  | -0.03175 | 0.00378  | #112 |
| C5a  | 0.02194  | 0.05410  | 0.08048  | #113 |
| C6a  | -0.16985 | 0.09029  | 0.06032  | #114 |
| H13a | -0.45424 | 0.07313  | -0.04772 | #115 |
| H14a | -0.01238 | -0.14700 | -0.15216 | #116 |
| H15a | 0.22806  | -0.06095 | 0.01812  | #117 |
| H16a | 0.12181  | 0.09323  | 0.15494  | #118 |
| N7a  | -0.38427 | -0.09257 | -0.20862 | #129 |
| O9a  | -0.32536 | -0.16789 | -0.27327 | #130 |
| O10a | -0.55075 | -0.05655 | -0.22103 | #131 |
| N8a  | -0.23131 | 0.18127  | 0.14145  | #135 |
| O11a | -0.40111 | 0.21133  | 0.12141  | #136 |
| O12a | -0.10822 | 0.22083  | 0.22366  | #137 |
| #END |          |          |          |      |

### Simulated cocrystal structures of BTF-1,4-dinitrobenzene

data\_ BTF-1,4-dinitrobenzene(1:1)\_-3.61177E+01

\_chemical\_name\_systematic

;RAS b3lyp-d3

E(total)=-3.61177E+01 E(coul)=-6.22070E+00 E(vdW)=-3.07641E+01 Density= 1.79845

;

\_cell\_length\_a 8.330

\_cell\_length\_b 8.886

\_cell\_length\_c 11.275

\_cell\_angle\_alpha 71.05

\_cell\_angle\_beta 81.46

\_cell\_angle\_gamma 81.40

\_cell\_formula\_units\_Z 2

\_symmetry\_space\_group\_name\_H-M 'P -1'

\_symmetry\_Int\_Tables\_number 2

loop\_

\_symmetry\_equiv\_pos\_as\_xyz

1 x,y,z

2 -x,-y,-z

loop\_

```

_atom_site_label
_atom_site_fract_x
_atom_site_fract_y
_atom_site_fract_z
C1      0.26635 -1.38092  0.52076      # 1
C2      0.34358 -1.31531  0.59510      # 2
C3      0.32912 -1.14599  0.57690      # 3
C4      0.23365 -1.04241  0.48065      # 4
C5      0.15341 -1.10226  0.40321      # 5
C6      0.17165 -1.27144  0.42513      # 6
N7      0.42355 -1.43636  0.67654      # 7
O8      0.39196 -1.58211  0.64893      # 8
N'9     0.29549 -1.53723  0.55308      # 9
N'10    0.39092 -1.06659  0.63577      # 10
O11     0.34019 -0.90895  0.58220      # 11
N12     0.23689 -0.89306  0.48031      # 12
N'13    0.06247 -1.02535  0.31203      # 13
O14     0.01673 -1.13811  0.26975      # 14
N15     0.08844 -1.29975  0.34403      # 15
O16     0.17962 -0.76162  0.42093      # 16
O17     0.50732 -1.45087  0.75920      # 17
O18     0.06195 -1.41668  0.32075      # 18
C1a     0.61354 -0.29226 -0.02773      # 37
C2a     0.60568 -0.20933  0.05915      # 38
C3a     0.74313 -0.15905  0.08574      # 39
C4a     0.89422 -0.19300  0.02306      # 40
C5a     0.90208 -0.27593 -0.06383      # 41
C6a     0.76463 -0.32621 -0.09042      # 42
H10a    0.50304 -0.32859 -0.04489      # 43
H11a    0.73027 -0.09501  0.15408      # 44
H15a    0.77749 -0.39025 -0.15876      # 45
H16a    1.00472 -0.15667  0.04022      # 46
N7a     0.44455 -0.17318  0.12611      # 59
O8a     0.32552 -0.22059  0.10232      # 60
O9a     0.44069 -0.09818  0.20103      # 61
N12a    1.06321 -0.31186 -0.13080      # 66
O13a    1.07274 -0.40880 -0.18898      # 67
O14a    1.17661 -0.24221 -0.12382      # 68
#END

```

data\_ BTF-1,4-dinitrobenzene(1:2)\_-6.74377E+01

\_chemical\_name\_systematic

;RAS b3lyp-d3

E(total)=-6.74377E+01 E(coul)=-1.36784E+01 E(vdW)=-5.37593E+01 Density= 1.72619

```

;
_cell_length_a 33.658
_cell_length_b 5.352
_cell_length_c 12.717
_cell_angle_alpha 90.00
_cell_angle_beta 98.78
_cell_angle_gamma 90.00
_cell_formula_units_Z 4
_symmetry_space_group_name_H-M 'P 21/C '
_symmetry_Int_Tables_number 14
loop_
_symmetry_equiv_pos_as_xyz
  1 x,y,z
  2 -x,1/2+y,1/2-z
  3 -x,-y,-z
  4 x,1/2-y,1/2+z
loop_
_atom_site_label
_atom_site_fract_x
_atom_site_fract_y
_atom_site_fract_z
C1      0.40737  0.23214 -0.10446      # 1
C2      0.43565  0.03468 -0.07648      # 2
C3      0.43178 -0.14045  0.00731      # 3
C4      0.39828 -0.11203  0.06326      # 4
C5      0.36896  0.08342  0.03826      # 5
C6      0.37419  0.25246 -0.04567      # 6
N7      0.46344  0.05092 -0.14015      # 7
O8      0.45094  0.27058 -0.20989      # 8
N9      0.41661  0.36911 -0.18267      # 9
N10     0.45463 -0.32990  0.04290      # 10
O11     0.43763 -0.43463  0.12292      # 11
N12     0.40062 -0.29153  0.13630      # 12
N13     0.33687  0.13590  0.08089      # 13
O14     0.31954  0.33916  0.02808      # 14
N15     0.34405  0.41573 -0.05504      # 15
O16     0.38107 -0.35543  0.20384      # 16
O17     0.49344 -0.06322 -0.15179      # 17
O18     0.33360  0.59376 -0.11093      # 18
C1a     0.23177  0.42613 -0.38884      # 37
C2a     0.20511  0.31957 -0.32793      # 38
C3a     0.20063  0.40843 -0.22739      # 39
C4a     0.22369  0.61163 -0.18619      # 40
C5a     0.25035  0.71819 -0.24710      # 41
C6a     0.25483  0.62933 -0.34764      # 42
H10a    0.23409  0.34985 -0.46648      # 43
H11a    0.17949  0.31882 -0.18338      # 44

```

|      |         |          |          |      |
|------|---------|----------|----------|------|
| H15a | 0.27597 | 0.71895  | -0.39164 | # 45 |
| H16a | 0.22137 | 0.68791  | -0.10854 | # 46 |
| N7a  | 0.18059 | 0.10345  | -0.37175 | # 57 |
| O8a  | 0.18509 | 0.02866  | -0.46053 | # 58 |
| O9a  | 0.15731 | 0.01287  | -0.31651 | # 59 |
| N12a | 0.27487 | 0.93431  | -0.20328 | # 63 |
| O13a | 0.29815 | 1.02490  | -0.25852 | # 64 |
| O14a | 0.27037 | 1.00911  | -0.11450 | # 65 |
| C1a  | 0.08030 | 0.39926  | -0.19804 | # 69 |
| C2a  | 0.05302 | 0.29830  | -0.13755 | # 70 |
| C3a  | 0.04853 | 0.39032  | -0.03751 | # 71 |
| C4a  | 0.07223 | 0.59098  | 0.00360  | # 72 |
| C5a  | 0.09951 | 0.69194  | -0.05690 | # 73 |
| C6a  | 0.10400 | 0.59992  | -0.15693 | # 74 |
| H10a | 0.08260 | 0.32072  | -0.27530 | # 75 |
| H11a | 0.02689 | 0.30504  | 0.00618  | # 76 |
| H15a | 0.12564 | 0.68520  | -0.20063 | # 77 |
| H16a | 0.06993 | 0.66953  | 0.08086  | # 78 |
| N7a  | 0.02782 | 0.08487  | -0.18127 | # 89 |
| O8a  | 0.03235 | 0.00720  | -0.26960 | # 90 |
| O9a  | 0.00401 | -0.00078 | -0.12640 | # 91 |
| N12a | 0.12471 | 0.90537  | -0.01317 | # 95 |
| O13a | 0.14852 | 0.99102  | -0.06804 | # 96 |
| O14a | 0.12018 | 0.98304  | 0.07516  | # 97 |
| #END |         |          |          |      |

data\_ BTF-1,4-dinitrobenzene(1:3)\_-9.02460E+01  
 \_chemical\_name\_systematic  
 ;RAS b3lyp-d3

E(total)=-9.02460E+01 E(coul)=-1.81237E+01 E(vdW)=-7.21223E+01 Density= 1.71598

;  
 \_cell\_length\_a 8.166  
 \_cell\_length\_b 8.688  
 \_cell\_length\_c 21.324  
 \_cell\_angle\_alpha 78.79  
 \_cell\_angle\_beta 94.69  
 \_cell\_angle\_gamma 98.92  
 \_cell\_formula\_units\_Z 2  
 \_symmetry\_space\_group\_name\_H-M 'P -1'  
 \_symmetry\_Int\_Tables\_number 2  
 loop\_  
 \_symmetry\_equiv\_pos\_as\_xyz  
 1 x,y,z  
 2 -x,-y,-z

| loop_              |         |          |         |      |
|--------------------|---------|----------|---------|------|
| _atom_site_label   |         |          |         |      |
| _atom_site_fract_x |         |          |         |      |
| _atom_site_fract_y |         |          |         |      |
| _atom_site_fract_z |         |          |         |      |
| C1                 | 0.26541 | 0.37892  | 0.49056 | # 1  |
| C2                 | 0.34613 | 0.30006  | 0.45158 | # 2  |
| C3                 | 0.33112 | 0.12993  | 0.46091 | # 3  |
| C4                 | 0.23143 | 0.03938  | 0.51115 | # 4  |
| C5                 | 0.14756 | 0.11285  | 0.55174 | # 5  |
| C6                 | 0.16653 | 0.28225  | 0.54048 | # 6  |
| N7                 | 0.42962 | 0.41081  | 0.40911 | # 7  |
| O8                 | 0.39653 | 0.56415  | 0.42373 | # 8  |
| N9                 | 0.29576 | 0.53352  | 0.47384 | # 9  |
| N10                | 0.39574 | 0.03942  | 0.43001 | # 10 |
| O11                | 0.34283 | -0.11316 | 0.45786 | # 11 |
| N12                | 0.23490 | -0.11319 | 0.51115 | # 12 |
| N13                | 0.05258 | 0.04875  | 0.59936 | # 13 |
| O14                | 0.00473 | 0.17070  | 0.62162 | # 14 |
| N15                | 0.07957 | 0.32407  | 0.58295 | # 15 |
| O16                | 0.17513 | -0.23807 | 0.54207 | # 16 |
| O17                | 0.51714 | 0.41250  | 0.36587 | # 17 |
| O18                | 0.05182 | 0.44726  | 0.59527 | # 18 |
| C1a                | 0.78044 | 0.06432  | 0.19378 | # 37 |
| C2a                | 0.63818 | 0.12141  | 0.20602 | # 38 |
| C3a                | 0.63834 | 0.21945  | 0.25058 | # 39 |
| C4a                | 0.78642 | 0.26202  | 0.28418 | # 40 |
| C5a                | 0.92868 | 0.20493  | 0.27194 | # 41 |
| C6a                | 0.92852 | 0.10689  | 0.22738 | # 42 |
| H10a               | 0.77353 | -0.01151 | 0.15866 | # 43 |
| H11a               | 0.52435 | 0.26051  | 0.25826 | # 44 |
| H15a               | 1.04251 | 0.06583  | 0.21970 | # 45 |
| H16a               | 0.79333 | 0.33785  | 0.31930 | # 46 |
| N7a                | 0.48067 | 0.07613  | 0.17028 | # 57 |
| O8a                | 0.48379 | -0.01039 | 0.13127 | # 58 |
| O9a                | 0.35703 | 0.12800  | 0.18193 | # 59 |
| N12a               | 1.08619 | 0.25021  | 0.30768 | # 63 |
| O13a               | 1.20983 | 0.19834  | 0.29603 | # 64 |
| O14a               | 1.08307 | 0.33673  | 0.34669 | # 65 |
| C1a                | 0.12926 | -0.28164 | 0.24991 | # 69 |
| C2a                | 0.13487 | -0.38067 | 0.20619 | # 70 |
| C3a                | 0.28118 | -0.43134 | 0.19427 | # 71 |
| C4a                | 0.42748 | -0.38106 | 0.22733 | # 72 |
| C5a                | 0.42187 | -0.28203 | 0.27105 | # 73 |
| C6a                | 0.27556 | -0.23136 | 0.28297 | # 74 |
| H10a               | 0.01230 | -0.24577 | 0.25738 | # 75 |
| H11a               | 0.27870 | -0.50827 | 0.15982 | # 76 |

|      |          |          |          |      |
|------|----------|----------|----------|------|
| H15a | 0.27804  | -0.15443 | 0.31742  | # 77 |
| H16a | 0.54444  | -0.41693 | 0.21986  | # 78 |
| N7a  | -0.02074 | -0.43415 | 0.17103  | # 89 |
| O8a  | -0.14804 | -0.38784 | 0.18240  | # 90 |
| O9a  | -0.01252 | -0.52138 | 0.13276  | # 91 |
| N12a | 0.57748  | -0.22855 | 0.30621  | # 95 |
| O13a | 0.56926  | -0.14132 | 0.34448  | # 96 |
| O14a | 0.70478  | -0.27486 | 0.29484  | # 97 |
| C1a  | 0.19220  | 0.38025  | 0.01473  | #101 |
| C2a  | 0.30359  | 0.39518  | -0.03297 | #102 |
| C3a  | 0.36203  | 0.26529  | -0.04824 | #103 |
| C4a  | 0.30698  | 0.11473  | -0.01451 | #104 |
| C5a  | 0.19559  | 0.09980  | 0.03319  | #105 |
| C6a  | 0.13715  | 0.22969  | 0.04846  | #106 |
| H10a | 0.15070  | 0.48503  | 0.02469  | #107 |
| H11a | 0.44849  | 0.28345  | -0.08573 | #108 |
| H15a | 0.05069  | 0.21153  | 0.08595  | #109 |
| H16a | 0.34848  | 0.00995  | -0.02447 | #110 |
| N7a  | 0.36215  | 0.55532  | -0.06884 | #121 |
| O8a  | 0.30881  | 0.66787  | -0.05448 | #122 |
| O9a  | 0.46031  | 0.56532  | -0.11065 | #123 |
| N12a | 0.13703  | -0.06034 | 0.06906  | #127 |
| O13a | 0.03887  | -0.07034 | 0.11087  | #128 |
| O14a | 0.19037  | -0.17289 | 0.05470  | #129 |
| #END |          |          |          |      |

data\_ BTF-1,4-dinitrobenzene(2:1)\_-7.26160E+01  
 \_chemical\_name\_systematic  
 ;RAS b3lyp-d3

E(total)=-7.26160E+01 E(coul)=-1.55251E+01 E(vdW)=-5.70909E+01 Density= 1.81641

;  
 \_cell\_length\_a 6.202  
 \_cell\_length\_b 33.266  
 \_cell\_length\_c 12.747  
 \_cell\_angle\_alpha 90.00  
 \_cell\_angle\_beta 69.20  
 \_cell\_angle\_gamma 90.00  
 \_cell\_formula\_units\_Z 4  
 \_symmetry\_space\_group\_name\_H-M 'P 21/C '  
 \_symmetry\_Int\_Tables\_number 14  
 loop\_  
 \_symmetry\_equiv\_pos\_as\_xyz  
 1 x,y,z  
 2 -x,1/2+y,1/2-z

3 -x,-y,-z  
 4 x,1/2-y,1/2+z  
 loop\_  
 \_atom\_site\_label  
 \_atom\_site\_fract\_x  
 \_atom\_site\_fract\_y  
 \_atom\_site\_fract\_z

|     |          |          |          |      |
|-----|----------|----------|----------|------|
| C1  | 0.19396  | 0.19731  | 0.54591  | # 1  |
| C2  | 0.34468  | 0.19737  | 0.60871  | # 2  |
| C3  | 0.36920  | 0.23186  | 0.67178  | # 3  |
| C4  | 0.23650  | 0.26688  | 0.67026  | # 4  |
| C5  | 0.08231  | 0.26840  | 0.60844  | # 5  |
| C6  | 0.06429  | 0.23332  | 0.54718  | # 6  |
| N7  | 0.44588  | 0.16152  | 0.59586  | # 7  |
| O8  | 0.34969  | 0.13890  | 0.52117  | # 8  |
| N9  | 0.19824  | 0.16293  | 0.49500  | # 9  |
| N10 | 0.49763  | 0.23702  | 0.73312  | # 10 |
| O11 | 0.45691  | 0.27513  | 0.77459  | # 11 |
| N12 | 0.28539  | 0.29474  | 0.73330  | # 12 |
| N13 | -0.05041 | 0.29762  | 0.59802  | # 13 |
| O14 | -0.16114 | 0.28354  | 0.53038  | # 14 |
| N15 | -0.08581 | 0.24131  | 0.49698  | # 15 |
| O16 | 0.22591  | 0.32891  | 0.76094  | # 16 |
| O17 | 0.58450  | 0.14531  | 0.62867  | # 17 |
| O18 | -0.16494 | 0.22334  | 0.43653  | # 18 |
| C1  | 0.87601  | 0.09572  | -0.20423 | # 37 |
| C2  | 0.80661  | 0.05446  | -0.19303 | # 38 |
| C3  | 0.57083  | 0.04241  | -0.13594 | # 39 |
| C4  | 0.40362  | 0.07330  | -0.08958 | # 40 |
| C5  | 0.46432  | 0.11527  | -0.09850 | # 41 |
| C6  | 0.70092  | 0.12563  | -0.15606 | # 42 |
| N7  | 0.99364  | 0.03231  | -0.24304 | # 43 |
| O8  | 1.18493  | 0.06214  | -0.28638 | # 44 |
| N9  | 1.09786  | 0.09987  | -0.25903 | # 45 |
| N10 | 0.47845  | 0.00645  | -0.11821 | # 46 |
| O11 | 0.24904  | 0.01170  | -0.06013 | # 47 |
| N12 | 0.19989  | 0.05561  | -0.04133 | # 48 |
| N13 | 0.33485  | 0.14707  | -0.06144 | # 49 |
| O14 | 0.47719  | 0.17956  | -0.09216 | # 50 |
| N15 | 0.71763  | 0.16548  | -0.15431 | # 51 |
| O16 | 0.00464  | 0.06660  | 0.00907  | # 52 |
| O17 | 1.03573  | -0.00312 | -0.25882 | # 53 |
| O18 | 0.87079  | 0.18992  | -0.18893 | # 54 |
| C1a | 0.84756  | 0.09948  | 0.35882  | # 73 |
| C2a | 0.71567  | 0.07127  | 0.43580  | # 74 |
| C3a | 0.52208  | 0.05291  | 0.42561  | # 75 |
| C4a | 0.45793  | 0.06315  | 0.33499  | # 76 |

|      |         |         |         |      |
|------|---------|---------|---------|------|
| C5a  | 0.58981 | 0.09135 | 0.25801 | # 77 |
| C6a  | 0.78340 | 0.10972 | 0.26819 | # 78 |
| H10a | 0.99637 | 0.11285 | 0.37065 | # 79 |
| H11a | 0.42565 | 0.03119 | 0.48778 | # 80 |
| H15a | 0.87983 | 0.13144 | 0.20603 | # 81 |
| H16a | 0.30912 | 0.04978 | 0.32315 | # 82 |
| N7a  | 0.78391 | 0.06039 | 0.53219 | # 93 |
| O8a  | 0.95519 | 0.07699 | 0.53928 | # 94 |
| O9a  | 0.66485 | 0.03545 | 0.59886 | # 95 |
| N12a | 0.52158 | 0.10224 | 0.16161 | # 99 |
| O13a | 0.64064 | 0.12718 | 0.09494 | #100 |
| O14a | 0.35030 | 0.08563 | 0.15453 | #101 |
| #END |         |         |         |      |

data\_ BTF-1,4-dinitrobenzene(3:1)\_-1.0047251E+02  
 \_chemical\_name\_systematic  
 ;RAS

E(total)=-9.89964E+01 E(coul)=-2.15212E+01 E(vdW)=-7.74751E+01 Density= 1.84462

;

\_cell\_length\_a 12.231  
 \_cell\_length\_b 12.682  
 \_cell\_length\_c 12.779  
 \_cell\_angle\_alpha 71.69  
 \_cell\_angle\_beta 63.62  
 \_cell\_angle\_gamma 89.77  
 \_cell\_formula\_units\_Z 2  
 \_symmetry\_space\_group\_name\_H-M 'P -1 '  
 \_symmetry\_Int\_Tables\_number 2  
 loop\_  
 \_symmetry\_equiv\_pos\_as\_xyz  
 1 x,y,z  
 2 -x,-y,-z  
 loop\_  
 \_atom\_site\_label  
 \_atom\_site\_fract\_x  
 \_atom\_site\_fract\_y  
 \_atom\_site\_fract\_z

|    |         |          |          |     |
|----|---------|----------|----------|-----|
| C1 | 0.19620 | -0.01867 | -0.29282 | # 1 |
| C2 | 0.10077 | -0.11451 | -0.21645 | # 2 |
| C3 | 0.12503 | -0.22359 | -0.16086 | # 3 |
| C4 | 0.24952 | -0.23429 | -0.18418 | # 4 |
| C5 | 0.34896 | -0.14054 | -0.26033 | # 5 |
| C6 | 0.31991 | -0.03400 | -0.31336 | # 6 |



|      |          |          |          |      |
|------|----------|----------|----------|------|
| N7   | -0.00471 | -0.08157 | -0.21011 | # 7  |
| O8   | 0.03014  | 0.04082  | -0.28711 | # 8  |
| N'9  | 0.15382  | 0.07182  | -0.33369 | # 9  |
| N'10 | 0.04960  | -0.31911 | -0.08939 | # 10 |
| O11  | 0.11937  | -0.39656 | -0.06230 | # 11 |
| N12  | 0.25067  | -0.34086 | -0.12456 | # 12 |
| N'13 | 0.46677  | -0.13551 | -0.29092 | # 13 |
| O14  | 0.52069  | -0.02706 | -0.36459 | # 14 |
| N15  | 0.42423  | 0.03962  | -0.37933 | # 15 |
| O16  | 0.32779  | -0.39575 | -0.11188 | # 16 |
| O17  | -0.11125 | -0.12560 | -0.16025 | # 17 |
| O18  | 0.45365  | 0.13855  | -0.44187 | # 18 |
| C1   | 0.30128  | -0.14946 | 0.11420  | # 37 |
| C2   | 0.30728  | -0.04768 | 0.13876  | # 38 |
| C3   | 0.25896  | -0.04606 | 0.26347  | # 39 |
| C4   | 0.20355  | -0.15086 | 0.36461  | # 40 |
| C5   | 0.19516  | -0.25568 | 0.34502  | # 41 |
| C6   | 0.24457  | -0.25266 | 0.21932  | # 42 |
| N7   | 0.36260  | 0.03621  | 0.02963  | # 43 |
| O8   | 0.39105  | -0.01897 | -0.06509 | # 44 |
| N'9  | 0.35060  | -0.13168 | -0.00546 | # 45 |
| N'10 | 0.25677  | 0.03847  | 0.30228  | # 46 |
| O11  | 0.20066  | -0.00554 | 0.42908  | # 47 |
| N12  | 0.16571  | -0.12990 | 0.47003  | # 48 |
| N'13 | 0.14804  | -0.35799 | 0.42588  | # 49 |
| O14  | 0.16369  | -0.42669 | 0.35871  | # 50 |
| N15  | 0.22710  | -0.35751 | 0.22304  | # 51 |
| O16  | 0.11446  | -0.18488 | 0.58005  | # 52 |
| O17  | 0.39136  | 0.13687  | -0.00474 | # 53 |
| O18  | 0.24958  | -0.40318 | 0.14738  | # 54 |
| C1   | 0.14445  | -0.60043 | -0.23827 | # 73 |
| C2   | 0.26160  | -0.52872 | -0.30439 | # 74 |
| C3   | 0.37466  | -0.57176 | -0.31910 | # 75 |
| C4   | 0.36712  | -0.69054 | -0.26490 | # 76 |
| C5   | 0.25159  | -0.76641 | -0.19744 | # 77 |
| C6   | 0.14198  | -0.71934 | -0.18551 | # 78 |
| N7   | 0.24244  | -0.42364 | -0.34467 | # 79 |
| O8   | 0.10611  | -0.43358 | -0.29989 | # 80 |
| N'9  | 0.05406  | -0.54385 | -0.23620 | # 81 |
| N'10 | 0.48841  | -0.51876 | -0.37603 | # 82 |
| O11  | 0.56067  | -0.59861 | -0.36253 | # 83 |
| N12  | 0.48101  | -0.71144 | -0.28954 | # 84 |
| N'13 | 0.22823  | -0.87600 | -0.14257 | # 85 |
| O14  | 0.10391  | -0.90641 | -0.09238 | # 86 |
| N15  | 0.04726  | -0.80353 | -0.12058 | # 87 |
| O16  | 0.52800  | -0.79399 | -0.26737 | # 88 |
| O17  | 0.30583  | -0.33187 | -0.40362 | # 89 |

|      |          |          |          |      |
|------|----------|----------|----------|------|
| O18  | -0.06313 | -0.81273 | -0.08381 | # 90 |
| C1a  | -0.36733 | 0.65753  | -0.27971 | #109 |
| C2a  | -0.24365 | 0.66832  | -0.36548 | #110 |
| C3a  | -0.14806 | 0.66840  | -0.33419 | #111 |
| C4a  | -0.17727 | 0.65727  | -0.21249 | #112 |
| C5a  | -0.30095 | 0.64648  | -0.12672 | #113 |
| C6a  | -0.39654 | 0.64640  | -0.15801 | #114 |
| N7a  | -0.21259 | 0.68016  | -0.49493 | #115 |
| O8a  | -0.29850 | 0.67984  | -0.52016 | #116 |
| O9a  | -0.10291 | 0.68954  | -0.56876 | #117 |
| H10a | -0.43801 | 0.65797  | -0.30887 | #118 |
| H11a | -0.05354 | 0.67705  | -0.40441 | #119 |
| N12a | -0.33201 | 0.63464  | 0.00273  | #120 |
| O13a | -0.44169 | 0.62526  | 0.07656  | #121 |
| O14a | -0.24610 | 0.63496  | 0.02796  | #122 |
| H15a | -0.49106 | 0.63775  | -0.08779 | #123 |
| H16a | -0.10659 | 0.65683  | -0.18333 | #124 |
| #END |          |          |          |      |

### Simulated cocrystal structures of BTF-1,3,5-trinitrobenzene

data\_BTF-1,3,5-trinitrobenzene(1:1)\_\_\_\_\_ -3.98822E+01

\_chemical\_name\_systematic

;RAS tnb-d3

E(total)=-3.98822E+01 E(coul)=-1.38601E+01 E(vdW)=-2.65282E+01 Density= 1.83247

;

\_cell\_length\_a 9.954

\_cell\_length\_b 11.803

\_cell\_length\_c 14.641

\_cell\_angle\_alpha 90.00

\_cell\_angle\_beta 101.37

\_cell\_angle\_gamma 90.00

\_cell\_formula\_units\_Z 4

\_symmetry\_space\_group\_name\_H-M 'P 21/C '

\_symmetry\_Int\_Tables\_number 14

loop\_

\_symmetry\_equiv\_pos\_as\_xyz

1 x,y,z

2 -x,1/2+y,1/2-z

3 -x,-y,-z

4 x,1/2-y,1/2+z

loop\_

\_atom\_site\_label

\_atom\_site\_fract\_x

\_atom\_site\_fract\_y

| _atom_site_fract_z |          |          |         |      |
|--------------------|----------|----------|---------|------|
| C1                 | 0.67623  | 0.16889  | 0.75618 | # 1  |
| C2                 | 0.60932  | 0.06496  | 0.77035 | # 2  |
| C3                 | 0.50491  | 0.01556  | 0.69942 | # 3  |
| C4                 | 0.46870  | 0.07402  | 0.61247 | # 4  |
| C5                 | 0.53287  | 0.17886  | 0.59462 | # 5  |
| C6                 | 0.63598  | 0.22433  | 0.66740 | # 6  |
| N7                 | 0.66173  | 0.02898  | 0.85608 | # 7  |
| O8                 | 0.76568  | 0.11659  | 0.89499 | # 8  |
| N'9                | 0.76758  | 0.19834  | 0.82960 | # 9  |
| N'10               | 0.43404  | -0.07783 | 0.70065 | # 10 |
| O11                | 0.34873  | -0.08566 | 0.61587 | # 11 |
| N12                | 0.37150  | 0.01407  | 0.55795 | # 12 |
| N'13               | 0.51239  | 0.24280  | 0.51997 | # 13 |
| O14                | 0.59960  | 0.33238  | 0.53936 | # 14 |
| N15                | 0.68078  | 0.32026  | 0.63619 | # 15 |
| O16                | 0.30515  | 0.02287  | 0.47973 | # 16 |
| O17                | 0.64432  | -0.05128 | 0.90366 | # 17 |
| O18                | 0.76454  | 0.39172  | 0.66683 | # 18 |
| C1a                | -0.01044 | 0.13055  | 0.42478 | # 37 |
| C2a                | 0.03177  | 0.08564  | 0.34725 | # 38 |
| C3a                | 0.13179  | 0.13660  | 0.30689 | # 39 |
| C4a                | 0.19013  | 0.23631  | 0.34711 | # 40 |
| C5a                | 0.15213  | 0.28521  | 0.42464 | # 41 |
| C6a                | 0.05158  | 0.23041  | 0.46196 | # 42 |
| H16a               | -0.08846 | 0.08941  | 0.45500 | # 43 |
| H17a               | 0.16300  | 0.10011  | 0.24657 | # 44 |
| H18a               | 0.19894  | 0.36284  | 0.45475 | # 45 |
| N7a                | -0.03215 | -0.02048 | 0.30620 | # 58 |
| O10a               | -0.12487 | -0.06019 | 0.34046 | # 59 |
| O11a               | 0.01222  | -0.06114 | 0.24091 | # 60 |
| N8a                | 0.29686  | 0.29240  | 0.30588 | # 65 |
| O14a               | 0.35029  | 0.37768  | 0.34514 | # 66 |
| O15a               | 0.32429  | 0.24953  | 0.23542 | # 67 |
| N9a                | 0.00872  | 0.28014  | 0.54434 | # 72 |
| O12a               | 0.06260  | 0.36978  | 0.57419 | # 73 |
| O13a               | -0.07768 | 0.22805  | 0.57686 | # 74 |
| #END               |          |          |         |      |

data\_BTF-1,3,5-trinitrobenzene(1:2)\_-7.04510E+01  
\_chemical\_name\_systematic  
;RAS tnb-d3

E(total)=-7.04510E+01 E(coul)=-1.81465E+01 E(vdW)=-5.23045E+01 Density= 1.72065

;

\_cell\_length\_a 9.912

\_cell\_length\_b 18.975

\_cell\_length\_c 15.939

\_cell\_angle\_alpha 90.00

\_cell\_angle\_beta 60.87

\_cell\_angle\_gamma 90.00

\_cell\_formula\_units\_Z 4

\_symmetry\_space\_group\_name\_H-M 'P 21/C '

\_symmetry\_Int\_Tables\_number 14

loop\_

\_symmetry\_equiv\_pos\_as\_xyz

1 x,y,z

2 -x,1/2+y,1/2-z

3 -x,-y,-z

4 x,1/2-y,1/2+z

loop\_

\_atom\_site\_label

\_atom\_site\_fract\_x

\_atom\_site\_fract\_y

\_atom\_site\_fract\_z

|      |          |          |          |      |
|------|----------|----------|----------|------|
| C1   | 0.59417  | 0.12486  | -0.09211 | # 1  |
| C2   | 0.59509  | 0.08696  | -0.01482 | # 2  |
| C3   | 0.50983  | 0.11049  | 0.08331  | # 3  |
| C4   | 0.42216  | 0.17406  | 0.10227  | # 4  |
| C5   | 0.41730  | 0.21420  | 0.02713  | # 5  |
| C6   | 0.50405  | 0.18853  | -0.06912 | # 6  |
| N7   | 0.68460  | 0.03060  | -0.05196 | # 7  |
| O8   | 0.73994  | 0.03535  | -0.15731 | # 8  |
| N'9  | 0.67935  | 0.09417  | -0.17522 | # 9  |
| N'10 | 0.49797  | 0.08259  | 0.16185  | # 10 |
| O11  | 0.40331  | 0.12566  | 0.23554  | # 11 |
| N12  | 0.35351  | 0.18574  | 0.19642  | # 12 |
| N'13 | 0.34398  | 0.27279  | 0.03170  | # 13 |
| O14  | 0.37806  | 0.28854  | -0.05990 | # 14 |
| N15  | 0.48320  | 0.23320  | -0.12613 | # 15 |
| O16  | 0.26844  | 0.23015  | 0.25076  | # 16 |
| O17  | 0.72574  | -0.01827 | -0.02124 | # 17 |
| O18  | 0.52712  | 0.23766  | -0.21119 | # 18 |
| C1a  | -0.40225 | 0.01952  | 0.34204  | # 37 |
| C2a  | -0.26471 | 0.04756  | 0.27014  | # 38 |
| C3a  | -0.16685 | 0.01035  | 0.18737  | # 39 |
| C4a  | -0.21119 | -0.05745 | 0.17806  | # 40 |
| C5a  | -0.34731 | -0.08828 | 0.24752  | # 41 |
| C6a  | -0.44051 | -0.04852 | 0.32874  | # 42 |
| H16a | -0.47658 | 0.04946  | 0.40583  | # 43 |

|      |          |          |          |      |
|------|----------|----------|----------|------|
| H17a | -0.06040 | 0.03325  | 0.13238  | # 44 |
| H18a | -0.37944 | -0.14113 | 0.23873  | # 45 |
| N7a  | -0.22073 | 0.11991  | 0.28218  | # 55 |
| O10a | -0.30949 | 0.15135  | 0.35597  | # 56 |
| O11a | -0.09873 | 0.14314  | 0.21749  | # 57 |
| N8a  | -0.10943 | -0.09845 | 0.09073  | # 61 |
| O14a | -0.15178 | -0.15809 | 0.08467  | # 62 |
| O15a | 0.00979  | -0.06978 | 0.03081  | # 63 |
| N9a  | -0.58625 | -0.07988 | 0.40403  | # 67 |
| O12a | -0.61671 | -0.13998 | 0.39016  | # 68 |
| O13a | -0.66590 | -0.04346 | 0.47478  | # 69 |
| C1a  | 0.07675  | 0.40514  | 0.01492  | # 73 |
| C2a  | 0.04785  | 0.38916  | -0.06002 | # 74 |
| C3a  | -0.03506 | 0.32986  | -0.05943 | # 75 |
| C4a  | -0.08983 | 0.28574  | 0.02015  | # 76 |
| C5a  | -0.06458 | 0.29898  | 0.09722  | # 77 |
| C6a  | 0.01909  | 0.35908  | 0.09258  | # 78 |
| H16a | 0.14156  | 0.45158  | 0.01289  | # 79 |
| H17a | -0.05613 | 0.31850  | -0.11857 | # 80 |
| H18a | -0.10832 | 0.26390  | 0.15839  | # 81 |
| N7a  | 0.10773  | 0.43719  | -0.14377 | # 91 |
| O10a | 0.18041  | 0.48903  | -0.14211 | # 92 |
| O11a | 0.08030  | 0.42163  | -0.20868 | # 93 |
| N8a  | -0.17856 | 0.22216  | 0.02293  | # 97 |
| O14a | -0.22528 | 0.18431  | 0.09411  | # 98 |
| O15a | -0.19885 | 0.21196  | -0.04614 | # 99 |
| N9a  | 0.04793  | 0.37464  | 0.17354  | #103 |
| O12a | -0.00445 | 0.33299  | 0.24096  | #104 |
| O13a | 0.12210  | 0.42804  | 0.16728  | #105 |
| #END |          |          |          |      |

data\_BTF-1,3,5-trinitrobenzene(1:3)\_-9.56424E+01

\_chemical\_name\_systematic

;RAS tnb-d3

E(total)=-9.56424E+01 E(coul)=-2.25486E+01 E(vdW)=-7.30938E+01 Density= 1.76039

;

\_cell\_length\_a 16.123

\_cell\_length\_b 11.753

\_cell\_length\_c 9.955

\_cell\_angle\_alpha 90.00

\_cell\_angle\_beta 63.07

\_cell\_angle\_gamma 90.00

\_cell\_formula\_units\_Z 2

\_symmetry\_space\_group\_name\_H-M 'P 21'

```

_symmetry_Int_Tables_number 4
loop_
_symmetry_equiv_pos_as_xyz
  1 x,y,z
  2 -x,1/2+y,-z
loop_
_atom_site_label
_atom_site_fract_x
_atom_site_fract_y
_atom_site_fract_z
C1      0.05317  0.33650  0.43852      # 1
C2      0.13893  0.27588  0.38936      # 2
C3      0.15556  0.16909  0.31048      # 3
C4      0.08279  0.12389  0.28166      # 4
C5     -0.00482  0.18146  0.32870      # 5
C6     -0.01780  0.28728  0.40666      # 6
N7      0.19371  0.33605  0.43013      # 7
O8      0.13722  0.43820  0.50792      # 8
N'9     0.05293  0.43142  0.50780      # 9
N'10    0.22904  0.10308  0.25809      # 10
O11     0.20884  0.01232  0.19301      # 11
N12     0.11278  0.02598  0.20849      # 12
N'13   -0.07805  0.15256  0.31180      # 13
O14    -0.14215  0.23654  0.37676      # 14
N15    -0.10258  0.32503  0.43907      # 15
O16     0.08160 -0.04622  0.15759      # 16
O17     0.27132  0.32602  0.41837      # 17
O18    -0.14900  0.40725  0.50173      # 18
C1a     0.44075  0.21609  0.42483      # 37
C2a     0.39909  0.11647  0.40995      # 38
C3a     0.32136  0.06920  0.52864      # 39
C4a     0.28536  0.12558  0.66633      # 40
C5a     0.32400  0.22543  0.68801      # 41
C6a     0.40167  0.26867  0.56520      # 42
H16a    0.50120  0.25130  0.33089      # 43
H17a    0.29012 -0.00840  0.51441      # 44
H18a    0.29479  0.26782  0.79618      # 45
N7a     0.43908  0.05844  0.26186      # 55
O10a    0.50764  0.10228  0.15946      # 56
O11a    0.40074 -0.02923  0.25239      # 57
N8a     0.20260  0.07737  0.79494      # 61
O14a    0.17252  0.12910  0.91486      # 62
O15a    0.17016 -0.01077  0.77218      # 63
N9a     0.44444  0.37490  0.58468      # 67
O12a    0.40833  0.41922  0.70985      # 68
O13a    0.51285  0.41085  0.47422      # 69
C1a     0.64328  0.01992 -0.16970      # 73

```

|      |          |          |          |      |
|------|----------|----------|----------|------|
| C2a  | 0.61036  | -0.08260 | -0.09452 | # 74 |
| C3a  | 0.52302  | -0.12566 | -0.06251 | # 75 |
| C4a  | 0.46794  | -0.06189 | -0.10883 | # 76 |
| C5a  | 0.49708  | 0.04118  | -0.18440 | # 77 |
| C6a  | 0.58509  | 0.07993  | -0.21326 | # 78 |
| H16a | 0.71149  | 0.05175  | -0.19338 | # 79 |
| H17a | 0.49887  | -0.20564 | -0.00387 | # 80 |
| H18a | 0.45302  | 0.08933  | -0.21936 | # 81 |
| N7a  | 0.67068  | -0.14852 | -0.04665 | # 91 |
| O10a | 0.74730  | -0.10824 | -0.07656 | # 92 |
| O11a | 0.63964  | -0.23859 | 0.01941  | # 93 |
| N8a  | 0.37455  | -0.10547 | -0.07641 | # 97 |
| O14a | 0.32767  | -0.04724 | -0.11873 | # 98 |
| O15a | 0.35089  | -0.19661 | -0.00960 | # 99 |
| N9a  | 0.61815  | 0.18943  | -0.29354 | #103 |
| O12a | 0.56519  | 0.24030  | -0.33045 | #104 |
| O13a | 0.69608  | 0.22127  | -0.31729 | #105 |
| C1a  | -0.05937 | -0.01434 | -0.07170 | #109 |
| C2a  | -0.09751 | -0.06550 | 0.06957  | #110 |
| C3a  | -0.17485 | -0.02167 | 0.19239  | #111 |
| C4a  | -0.21415 | 0.07728  | 0.16978  | #112 |
| C5a  | -0.17909 | 0.13223  | 0.03117  | #113 |
| C6a  | -0.10165 | 0.08442  | -0.08749 | #114 |
| H16a | 0.00085  | -0.04999 | -0.16564 | #115 |
| H17a | -0.20333 | -0.06295 | 0.30127  | #116 |
| H18a | -0.21083 | 0.20914  | 0.01623  | #117 |
| N7a  | -0.05407 | -0.17080 | 0.09002  | #127 |
| O10a | 0.01404  | -0.20730 | -0.02048 | #128 |
| O11a | -0.08935 | -0.21386 | 0.21597  | #129 |
| N8a  | -0.29658 | 0.12608  | 0.29839  | #133 |
| O14a | -0.32962 | 0.21341  | 0.27480  | #134 |
| O15a | -0.32582 | 0.07562  | 0.41914  | #135 |
| N9a  | -0.06266 | 0.14093  | -0.23655 | #139 |
| O12a | -0.10153 | 0.22789  | -0.24681 | #140 |
| O13a | 0.00566  | 0.09666  | -0.33891 | #141 |
| #END |          |          |          |      |

### Simulated cocrystal structures of BTF-1,2,3,3,5,6-hexanitrobenzene

```
data_BTF-HNB(1:1)_-5.56486E+01
_chemical_name_systematic
;RAS HNBZ
```

```
E(total)=-5.56486E+01 E(coul)=-1.11877E+01 E(vdW)=-4.44610E+01 Density= 1.99232
;
```

```

_cell_length_a 23.580
_cell_length_b 8.859
_cell_length_c 9.582
_cell_angle_alpha 90.00
_cell_angle_beta 91.35
_cell_angle_gamma 90.00
_cell_formula_units_Z 4
_symmetry_space_group_name_H-M 'P 21/C '
_symmetry_Int_Tables_number 14
loop_
_symmetry_equiv_pos_as_xyz
  1 x,y,z
  2 -x,1/2+y,1/2-z
  3 -x,-y,-z
  4 x,1/2-y,1/2+z
loop_
_atom_site_label
_atom_site_fract_x
_atom_site_fract_y
_atom_site_fract_z
C1      0.42867 -0.08899 -0.51702      # 1
C2      0.40782 -0.19725 -0.41978      # 2
C3      0.36474 -0.15987 -0.32130      # 3
C4      0.34273 -0.00919 -0.32261      # 4
C5      0.36237 0.10362 -0.41847      # 5
C6      0.40523 0.06121 -0.51440      # 6
N7      0.43516 -0.32627 -0.44096      # 7
O8      0.47427 -0.29317 -0.55668      # 8
N'9     0.46760 -0.14658 -0.59668      # 9
N'10    0.34105 -0.24371 -0.22617      # 10
O11     0.30288 -0.15411 -0.16108      # 11
N12     0.30399 -0.00070 -0.22420      # 12
N'13    0.34713 0.24506 -0.43395      # 13
O14     0.37863 0.30205 -0.53903      # 14
N15     0.41663 0.18175 -0.59163      # 15
O16     0.27275 0.09582 -0.18001      # 16
O17     0.43484 -0.45184 -0.39085      # 17
O18     0.44819 0.21078 -0.68593      # 18
C1A     0.11410 -0.12768 -0.06283      # 73
C2A     0.08714 0.00550 -0.10364      # 74
C3A     0.10967 0.14419 -0.06251      # 75
C4A     0.15916 0.14970 0.01941      # 76
C5A     0.18612 0.01652 0.06022      # 77
C6A     0.16359 -0.12217 0.01909      # 78
N7A     0.09003 -0.27580 -0.10675      # 79
O8A     0.08135 -0.36545 -0.01299      # 80
O9A     0.08150 -0.29211 -0.23193      # 81

```



|      |          |          |          |      |
|------|----------|----------|----------|------|
| N10A | 0.03428  | -0.00038 | -0.19113 | # 82 |
| O11A | 0.03470  | 0.07271  | -0.29902 | # 83 |
| O12A | -0.00395 | -0.07769 | -0.14584 | # 84 |
| N13A | 0.08088  | 0.28642  | -0.10609 | # 85 |
| O14A | 0.11033  | 0.37839  | -0.16547 | # 86 |
| O15A | 0.03083  | 0.29621  | -0.07788 | # 87 |
| N16A | 0.18323  | 0.29782  | 0.06333  | # 88 |
| O17A | 0.23277  | 0.31924  | 0.03516  | # 89 |
| O18A | 0.15090  | 0.38236  | 0.12292  | # 90 |
| N19A | 0.23898  | 0.02240  | 0.14771  | # 91 |
| O20A | 0.27958  | -0.04558 | 0.10224  | # 92 |
| O21A | 0.23620  | 0.09460  | 0.25577  | # 93 |
| N22A | 0.19238  | -0.26440 | 0.06267  | # 94 |
| O23A | 0.20142  | -0.27931 | 0.18781  | # 95 |
| O24A | 0.20394  | -0.35126 | -0.03130 | # 96 |
| #END |          |          |          |      |
